# Supplementary material for: Brain endothelial cell TRPA1 channels initiate neurovascular coupling
Source: eLife journal article supplement (doi:10.7554/elife.63040), 2021-02-26
Supplement: supp [file elife-63040-supp-v1.zip]

Archive with 42 entries (42 files):
- elife_poa_e63040_Transparent_Reporting_File.pdf
- elife_poa_e63040_Figure_1_source_data_1.xlsx
- elife_poa_e63040_Figure_2_source_data_1.xlsx
- elife_poa_e63040_Figure_3_source_data_1.xlsx
- elife_poa_e63040_Figure_4_source_data_1.xlsx
- elife_poa_e63040_Figure_5_source_data_1.xlsx
- elife_poa_e63040_Figure_6_source_data_1.xlsx
- elife_poa_e63040_Figure_7_source_data_1.xlsx
- elife_poa_e63040_Figure_8_source_data_1.xlsx
- elife_poa_e63040_Figure_1_figure_supplement_1.pdf
- elife_poa_e63040_Figure_1_figure_supplement_1_source_data_1.xlsx
- elife_poa_e63040_Figure_2_figure_supplement_1.pdf
- elife_poa_e63040_Figure_2_figure_supplement_1_source_data_1.xlsx
- elife_poa_e63040_Figure_2_figure_supplement_2.pdf
- elife_poa_e63040_Figure_2_figure_supplement_2_source_data_1.xlsx
- elife_poa_e63040_Figure_4_figure_supplement_1.pdf
- elife_poa_e63040_Figure_4_figure_supplement_1_source_data_1.xlsx
- elife_poa_e63040_Figure_4_figure_supplement_2.pdf
- elife_poa_e63040_Figure_4_figure_supplement_2_source_data_1.xlsx
- elife_poa_e63040_Figure_5_figure_supplement_1.pdf
- elife_poa_e63040_Figure_5_figure_supplement_1_source_data_1.xlsx
- elife_poa_e63040_Figure_6_figure_supplement_1.pdf
- elife_poa_e63040_Figure_6_figure_supplement_1_source_data_1.xlsx
- elife_poa_e63040_Figure_6_figure_supplement_2.pdf
- elife_poa_e63040_Figure_6_figure_supplement_2_source_data_1.xlsx
- elife_poa_e63040_Figure_7_figure_supplement_1.pdf
- elife_poa_e63040_Figure_7_figure_supplement_1_source_data_1.xlsx
- elife_poa_e63040_Figure_8_figure_supplement_1.pdf
- elife_poa_e63040_Figure_8_figure_supplement_2.pdf
- elife_poa_e63040_Figure_8_figure_supplement_2_source_data_1.xlsx
- elife_poa_e63040_Figure_8_figure_supplement_3.pdf
- elife_poa_e63040_Figure_8_figure_supplement_3_source_data_1.xlsx
- elife_poa_e63040_Video_1.mov
- elife_poa_e63040_Video_2.mov
- elife_poa_e63040_Video_3.mov
- elife_poa_e63040_Video_4.mov
- elife_poa_e63040_Video_5.mov
- elife_poa_e63040_Video_6.mov
- elife_poa_e63040_Video_7.mov
- elife_poa_e63040_Video_8.mov
- elife_poa_e63040_Video_9.mov
- elife_poa_e63040_Video_10.mov
