# Supplementary material for: Brain endothelial cell TRPA1 channels initiate neurovascular coupling
Source: eLife journal article supplement (doi:10.7554/elife.63040), 2021-02-26
Supplement: supp [file elife-63040-supp-v1.zip › elife_poa_e63040_Figure_1_figure_supplement_1_source_data_1.xlsx]

## Sheet: Figure 1-figure supplement 1C
Current Density at +40 mV (pA/pF)
	Control	NS309	KCl
Cell 1	0.322464	0.451122	-0.0897048
Cell 2	0.471128	0.475755	0.12965
Cell 3	0.47041	0.57014	0.0449555
Cell 4	0.862863	0.48645	0.0144043
Cell 5	0.119794	0.192909	0.0430298
Cell 6	-0.04532	0.178237	0.0120083
Mean	0.3669	0.3924	0.02572
Median	0.3964	0.4634	0.02872
Std. Deviation	0.3164	0.1652	0.07087
Std. Error of Mean	0.1292	0.06745	0.02893
Lower 95% CI	0.03486	0.219	-0.04865
Upper 95% CI	0.6989	0.5658	0.1001
One-way ANOVA and Tukey's multiple comparisons test
	Mean Diff.	SE of diff.	95.00% CI of diff.	Adjusted P Value	Significant?
Control vs. NS309	-0.02555	0.08556	-0.3040 to 0.2529	0.9525	No
Control vs. KCl	0.3412	0.1289	-0.07815 to 0.7605	0.0979	No

## Sheet: Figure 1-figure supplement 1D
Current Density at -80 mV (pA/pF)
	Control	NS309	KCl
Cell 1	-0.39945	-0.478105	-10.1761
Cell 2	-0.39072	-0.350828	-4.47791
Cell 3	-0.46198	-0.211036	-4.84506
Cell 4	-0.45122	-0.171847	-3.57842
Cell 5	-0.17156	-0.138779	-11.8717
Cell 6	-0.31738	-0.333195	-11.1567
Mean	-0.3654	-0.2806	-7.684
Median	-0.3951	-0.2721	-7.511
Std. Deviation	0.108	0.1292	3.768
Std. Error of Mean	0.04411	0.05275	1.538
Lower 95% CI	-0.4788	-0.4162	-11.64
Upper 95% CI	-0.252	-0.145	-3.73
One-way ANOVA and Tukey's multiple comparisons test
	Mean Diff.	SE of diff.	95.00% CI of diff.	Adjusted P Value	Significant?
Control vs. NS309	-0.08475	0.05973	-0.2658 to 0.09626	0.3415	No
Control vs. KCl	7.319	1.573	2.551 to 12.09	0.0098	Yes
