# Supplementary material for: Brain endothelial cell TRPA1 channels initiate neurovascular coupling
Source: eLife journal article supplement (doi:10.7554/elife.63040), 2021-02-26
Supplement: supp [file elife-63040-supp-v1.zip › elife_poa_e63040_Figure_1_source_data_1.xlsx]

## Sheet: Figure 1E
Current Density at +80 mV (pA/pF)
	Trpa1fl/fl Control	Trpa1fl/fl 4-HNE	Trpa1fl/fl 4-HNE + HC-030031	Trpa1-ecKO Control	Trpa1-ecKO 4-HNE	Trpa1-ecKO KCl
Cell 1	7.03194	19.3593	5.53615	6.13846	5.73078	5.04355
Cell 2	4.88984	31.9186	5.31911	4.72906	5.0785	8.33992
Cell 3	13.03	27.3919	17.3188	11.6701	19.0735	20.1826
Cell 4	16.4906	51.0168	33.7617	7.57418	6.02321	7.40854
Cell 5	9.53485	22.668	14.4237	7.42026	8.48915	6.51145
Cell 6	3.27134	30.3948	4.07149	12.3131	13.02	10.3571
Cell 7	24.5522	45.5623	27.0792	0.891294	1.40061	1.15006
Cell 8	7.03194	41.5372	8.85322	1.12353	0.995997	2.4657
Cell 9	24.5522	47.1113	20.1064
Cell 10	7.03194	10.0647	7.76419
Cell 11	7.03194	15.2214	6.79166
Cell 12	13.03	30.4181	11.5791
Mean	11.46	31.06	13.55	6.483	7.476	7.682
Median	8.283	30.41	10.22	6.779	5.877	6.96
Std. Deviation	7.169	13.11	9.421	4.245	6.048	5.881
Std. Error of Mean	2.07	3.784	2.72	1.501	2.138	2.079
Lower 95% CI	6.901	22.73	7.564	2.933	2.42	2.765
Upper 95% CI	16.01	39.38	19.54	10.03	12.53	12.6
One-way ANOVA and Tukey's multiple comparisons test
	Mean Diff.	SE of diff.	95.00% CI of diff.	Adjusted P Value	Significant?
Trpa1fl/fl Control vs. Trpa1fl/fl 4-HNE	-19.6	3.538	-30.05 to -9.145	<0.0001	Yes
Trpa1fl/fl Control vs. Trpa1fl/fl 4-HNE + HC-030031	-2.094	3.538	-12.55 to 8.360	0.9912	No
Trpa1fl/fl Control vs. Trpa1-ecKO Control	4.974	3.956	-6.714 to 16.66	0.8063	No
Trpa1fl/fl 4-HNE vs. Trpa1fl/fl 4-HNE + HC-030031	17.5	3.538	7.051 to 27.96	0.0001	Yes
Trpa1fl/fl 4-HNE vs. Trpa1-ecKO 4-HNE	23.58	3.956	11.89 to 35.27	<0.0001	Yes
Trpa1-ecKO Control vs. Trpa1-ecKO 4-HNE	-0.994	4.333	-13.80 to 11.81	>0.9999	No
Trpa1-ecKO Control vs. Trpa1-ecKO KCl	-1.2	4.333	-14.00 to 11.60	0.9998	No

## Sheet: Figure 1F
Current Density at -80 mV (pA/pF)
	Trpa1fl/fl Control	Trpa1fl/fl 4-HNE	Trpa1fl/fl 4-HNE + HC-030031	Trpa1-ecKO Control	Trpa1-ecKO 4-HNE	Trpa1-ecKO KCl
Cell 1	-4.12977	-11.0645	-1.62858	-2.93528	-4.44951	-9.51636
Cell 2	-3.49274	-21.5457	-3.04786	-1.70459	-1.82831	-8.88034
Cell 3	-9.45245	-16.9961	-11.487	-13.3656	-14.5312	-30.016
Cell 4	-7.83761	-33.4183	-21.162	-9.56686	-7.6043	-17.8287
Cell 5	-7.804	-10.4306	-6.64942	-3.78501	-4.1413	-23.1851
Cell 6	-1.71941	-25.9176	-1.79756	-9.43806	-7.90629	-19.9719
Cell 7	-3.91376	-12.1794	-8.72029	-0.69234	-0.64375	-4.79172
Cell 8	-4.12977	-49.6544	-6.33613	-0.36551	-0.42059	-9.5333
Cell 9	-9.45245	-30.0925	-12.0743
Cell 10	-1.71941	-12.1173	-2.41597
Cell 11	-9.45245	-12.7246	-9.27389
Cell 12	-13.4525	-52.7167	-14.7899
Mean	-6.38	-24.07	-8.282	-5.232	-5.191	-15.47
Median	-5.967	-19.27	-7.685	-3.36	-4.295	-13.68
Std. Deviation	3.699	14.85	5.944	4.881	4.733	8.661
Std. Error of Mean	1.068	4.288	1.716	1.726	1.673	3.062
Lower 95% CI	-8.73	-33.51	-12.06	-9.312	-9.148	-22.71
Upper 95% CI	-4.03	-14.63	-4.505	-1.151	-1.234	-8.225
One-way ANOVA and Tukey's multiple comparisons test
	Mean Diff.	SE of diff.	95.00% CI of diff.	Adjusted P Value	Significant?
Trpa1fl/fl Control vs. Trpa1fl/fl 4-HNE	17.69	3.431	7.554 to 27.83	<0.0001	Yes
Trpa1fl/fl Control vs. Trpa1fl/fl 4-HNE + HC-030031	1.902	3.431	-8.235 to 12.04	0.9935	No
Trpa1fl/fl Control vs. Trpa1-ecKO Control	-1.148	3.836	-12.48 to 10.19	0.9997	No
Trpa1fl/fl 4-HNE vs. Trpa1fl/fl 4-HNE + HC-030031	-15.79	3.431	-25.93 to -5.652	0.0004	Yes
Trpa1fl/fl 4-HNE vs. Trpa1-ecKO 4-HNE	-18.88	3.836	-30.21 to -7.547	0.0001	Yes
Trpa1-ecKO Control vs. Trpa1-ecKO 4-HNE	-0.041	4.202	-12.46 to 12.37	>0.9999	No
Trpa1-ecKO Control vs. Trpa1-ecKO KCl	10.23	4.202	-2.182 to 22.65	0.0001	Yes
