# Supplementary material for: Brain endothelial cell TRPA1 channels initiate neurovascular coupling
Source: eLife journal article supplement (doi:10.7554/elife.63040), 2021-02-26
Supplement: supp [file elife-63040-supp-v1.zip › elife_poa_e63040_Figure_2_figure_supplement_1_source_data_1.xlsx]

## Sheet: Figure 2-figure supplement 1B
Vasodilation (%)
	KCl	KCl + BaCl2
Preparation 1	23.2927	3.94264
Preparation 2	24.0518	4.93456
Preparation 3	9.22413	0.84686
Preparation 4	17.5072	1.93983
Preparation 5	19.616	-2.36025
Preparation 6	30.5366	-1.40794
Mean	20.7	1.316
Median	21.45	1.393
Std. Deviation	7.18	2.882
Std. Error of Mean	2.931	1.177
Lower 95% CI	13.17	-1.709
Upper 95% CI	28.24	4.341
Students paired t-test, two-tailed
Mean of differences (B - A)	-19.39
SD of differences	7.75
SEM of differences	3.164
95% confidence interval	-27.52 to -11.26
P value	0.0017
Significantly different (P < 0.05)?	Yes

## Sheet: Figure 2-figure supplement 1D
Vasodilation (%)
	KCl	aCSF
Preparation 1	28.2589	2.50867
Preparation 2	23.3735	-0.522213
Preparation 3	28.2572	-0.826468
Preparation 4	25.74	0.530083
Preparation 5	20.872	2.4947
Preparation 6	19.5629	2.81577
Mean	24.34	1.167
Median	20.54	-0.5983
Std. Deviation	3.7	1.644
Std. Error of Mean	1.51	0.6712
Lower 95% CI	20.46	-0.5586
Upper 95% CI	28.23	2.892
Students paired t-test, two-tailed
Mean of differences (B - A)	-23.18
SD of differences	4.702
SEM of differences	1.92
95% confidence interval	-28.11 to -18.24
P value	<0.0001
Significantly different (P < 0.05)?	Yes
