# Supplementary material for: Brain endothelial cell TRPA1 channels initiate neurovascular coupling
Source: eLife journal article supplement (doi:10.7554/elife.63040), 2021-02-26
Supplement: supp [file elife-63040-supp-v1.zip › elife_poa_e63040_Figure_2_figure_supplement_2_source_data_1.xlsx]

## Sheet: Figure 2-figure supplement 2B
Vasodilation (%)
	KCl	KCl Capillary Detached
Preparation 1	26.9594	6.28127
Preparation 2	8.41734	1.73891
Preparation 3	13.71	-0.70396
Preparation 4	14.808	-3.47349
Preparation 5	24.1191	7.1844
Preparation 6	23.1	1
Preparation 7	26.73	-0.71
Mean	19.69	1.617
Median	23.1	1
Std. Deviation	7.307	3.87
Std. Error of Mean	2.762	1.463
Lower 95% CI	12.93	-1.962
Upper 95% CI	26.45	5.196
Students paired t-test, two-tailed
Mean of differences (B - A)	-18.08
SD of differences	6.523
SEM of differences	2.466
95% confidence interval	-24.11 to -12.04
P value	0.0003
Significantly different (P < 0.05)?	Yes

## Sheet: Figure 2-figure supplement 2C
Vasodilation (%)
	AITC	AITC Capillary Detached
Preparation 1	24.4024	2.77932
Preparation 2	17.9183	0.289819
Preparation 3	16.5987	2.70471
Preparation 4	10.5119	0.491316
Preparation 5	12.5556	3.86589
Preparation 6	14.858	1.465
Preparation 7	22.2347	0.525
Mean	17.01	1.732
Median	16.6	1.465
Std. Deviation	4.994	1.399
Std. Error of Mean	1.888	0.5288
Lower 95% CI	12.39	0.4377
Upper 95% CI	21.63	3.025
Students paired t-test, two-tailed
Mean of differences (B - A)	-15.28
SD of differences	5.223
SEM of differences	1.974
95% confidence interval	-20.11 to -10.45
P value	0.0002
Significantly different (P < 0.05)?	Yes
