# Supplementary material for: Brain endothelial cell TRPA1 channels initiate neurovascular coupling
Source: eLife journal article supplement (doi:10.7554/elife.63040), 2021-02-26
Supplement: supp [file elife-63040-supp-v1.zip › elife_poa_e63040_Figure_2_source_data_1.xlsx]

## Sheet: Figure 2C
Vasodilation (%)
log [4-HNE] (M)	-8	-7.5	-7	-6.5	-6	-5.5
Preparation 1	0.744963	3.07735	4.86476	14.6793	20.7715	21.1164
Preparation 2	0.790727	1.33098	4.05923	7.53401	10.0879	11.2715
Preparation 3	0.667043	5.91162	12.7797	33.0204	37.4709	38.0109
Preparation 4	0.656573	2.47675	6.70358	12.7132	17.1223	19.8958
Preparation 5	0.350887	1.68479	4.76241	19.5666	22.4701	23.3085
Preparation 6	-0.53214	0.663568	9.21943	20.141	41.8144	36.0891
Mean	0.4463	2.524	7.065	17.94	24.96	24.95
Median	0.6618	2.081	5.784	17.12	21.62	22.21
Std. Deviation	0.5034	1.864	3.365	8.731	12.22	10.24
Std. Error of Mean	0.2055	0.761	1.374	3.564	4.99	4.182
Lower 95% CI	-0.08198	0.568	3.534	8.78	12.13	14.2
Upper 95% CI	0.9747	4.48	10.6	27.1	37.78	35.7
Nonlinear regression (curve fit)
	Best-fit values	Std. Error	95% CI (asymptotic)
Bottom	0.7361	2.841	-5.051 to 6.524
Top	25.73	2.953	19.72 to 31.75
LogEC50	-6.719	0.1561	-7.037 to -6.401
HillSlope	1.656	0.8677	-0.1119 to 3.423

## Sheet: Figure 2D
Vasodilation (%)
	4-HNE	4-HNE + HC-030031
Preparation 1	26.3158	-6.62477
Preparation 2	30.8567	-6.87508
Preparation 3	13.4362	-0.937215
Preparation 4	30.0395	-2.93448
Preparation 5	17.2959	-1.05356
Preparation 6	32.3351	5.40107
Preparation 7	19.4747	-3.68111
Preparation 8	31.8892	4.43826
Preparation 9	29.7826	1.14206
Mean	25.71	-1.236
Median	29.78	-1.054
Std. Deviation	7.111	4.355
Std. Error of Mean	2.37	1.452
Lower 95% CI	20.25	-4.584
Upper 95% CI	31.18	2.111
Students paired t-test, two-tailed
Mean of differences (B - A)	-26.95
SD of differences	7.4
SEM of differences	2.467
95% confidence interval	-32.64 to -21.26
P value	<0.0001
Significantly different (P < 0.05)?	Yes

## Sheet: Figure 2E
Vasodilation (%)
log [AITC] (M)	-7	-6.5	-6	-5.5	-5	-4.5	-4
Preparation 1	0.445018	0.0126426	3.04685	4.13411	9.42122	21.4822	22.6731
Preparation 2	-0.0081893	0.421751	-1.63582	4.76824	7.82696	18.5141	21.581
Preparation 3	0.583132	2.93864	3.12823	11.1312	37.3205	36.3294	31.8367
Preparation 4	1.48002	-0.8963	0.047845	10.9247	14.8895	17.5561	16.0218
Preparation 5	0.88096	0.0410483	2.39659	3.67225	6.42248	7.67288	8.74645
Preparation 6	-1.95394	-0.0716757	-0.80713	4.42208	15.5006	21.5307	19.1935
Mean	0.2378	0.4077	1.029	6.509	15.23	20.51	20.01
Median	0.5141	0.02685	1.222	4.595	12.16	20	20.39
Std. Deviation	1.182	1.314	2.087	3.52	11.44	9.271	7.653
Std. Error of Mean	0.4825	0.5362	0.8521	1.437	4.67	3.785	3.124
Lower 95% CI	-1.002	-0.9708	-1.161	2.815	3.225	10.79	11.98
Upper 95% CI	1.478	1.786	3.22	10.2	27.24	30.24	28.04
Nonlinear regression (curve fit)
	Best-fit values	Std. Error	95% CI (asymptotic)
Bottom	-1.164	1.929	-5.067 to 2.738
Top	22.74	2.628	17.42 to 28.05
LogEC50	-5.249	0.2268	-5.708 to -4.790
HillSlope	1.711	0.8467	-0.002627 to 3.426

## Sheet: Figure 2F
Vasodilation (%)
	AITC	AITC + HC-030031
Preparation 1	16.4455	-2.23174
Preparation 2	28.5232	8.36699
Preparation 3	9.76282	-3.31865
Preparation 4	25.9814	-0.44584
Preparation 5	30.3586	0.67169
Preparation 6	12.1119	0.09182
Preparation 7	24.1337	2.3159
Mean	21.05	0.7786
Median	24.13	0.09182
Std. Deviation	8.214	3.825
Std. Error of Mean	3.105	1.446
Lower 95% CI	13.45	-2.759
Upper 95% CI	28.64	4.316
Students paired t-test, two-tailed
Mean of differences (B - A)	-20.27
SD of differences	6.471
SEM of differences	2.446
95% confidence interval	-26.25 to -14.28
P value	0.0002
Significantly different (P < 0.05)?	Yes

## Sheet: Figure 2H
Vasodilation (%)
	KCl Trpa1 ecKO	4-HNE Trpa1-ecKO
Preparation 1	31.6656	0.800966
Preparation 2	10.1054	-0.38191
Preparation 3	18.3366	-12.8962
Preparation 4	21.6033	-2.22151
Preparation 5	9.73512	-4.40316
Preparation 6	28.1341	-0.59665
Preparation 7	29.1883	-7.3118
Mean	21.25	-3.859
Median	21.6	-2.222
Std. Deviation	8.984	4.848
Std. Error of Mean	3.396	1.832
Lower 95% CI	12.94	-8.342
Upper 95% CI	29.56	0.625
Students paired t-test, two-tailed
Mean of differences (B - A)	-25.11
SD of differences	9.568
SEM of differences	3.616
95% confidence interval	-33.96 to -16.26
P value	0.0004
Significantly different (P < 0.05)?	Yes

## Sheet: Figure 2I
Vasodilation (%)
	KCl Trpa1 ecKO	AITC Trpa1-ecKO
Preparation 1	15.5702	-3.07333
Preparation 2	25.1073	0.155336
Preparation 3	12.9903	1.25862
Preparation 4	19.008	0.527331
Preparation 5	19.0931	-0.27749
Preparation 6	8.11929	0.769972
Preparation 7	39.4741	3.73644
Mean	19.91	0.4424
Median	19.01	0.5273
Std. Deviation	10.14	2.025
Std. Error of Mean	3.833	0.7652
Lower 95% CI	10.53	-1.43
Upper 95% CI	29.29	2.315
Students paired t-test, two-tailed
Mean of differences (B - A)	-19.47
SD of differences	9.157
SEM of differences	3.461
95% confidence interval	-27.94 to -11.00
P value	0.0014
Significantly different (P < 0.05)?	Yes
