# Supplementary material for: Brain endothelial cell TRPA1 channels initiate neurovascular coupling
Source: eLife journal article supplement (doi:10.7554/elife.63040), 2021-02-26
Supplement: supp [file elife-63040-supp-v1.zip › elife_poa_e63040_Figure_3_source_data_1.xlsx]

## Sheet: Figure 3E
Velocity (µm/s)
	KCl	4-HNE	AITC
Preparation 1	161.062	95.8769	114.897
Preparation 2	221.112	74.7937	127.224
Preparation 3	150.387	64.7313	99.994
Preparation 4	151.611	110.679	66.1268
Preparation 5	136.573	134.393	100.198
Preparation 6	174.936	111.466	108.472
Preparation 7	346.882		86.1643
Preparation 8	166.874
Preparation 9	101.54
Preparation 10	162.542
Preparation 11	109.478
Preparation 12	362.022
Preparation 13	307.997
Preparation 14	233.541
Preparation 15	188.442
Mean	198.3	98.66	100.4
Median	166.9	103.3	100.2
Std. Deviation	81.29	25.74	19.88
Std. Error of Mean	20.99	10.51	7.516
Lower 95% CI	153.3	71.64	82.05
Upper 95% CI	243.3	125.7	118.8
One-way ANOVA and Tukey's multiple comparisons test
	Mean Diff.	SE of diff.	95.00% CI of diff.	Adjusted P Value	Significant?
KCl vs. 4-HNE	99.68	30.27	24.27 to 175.1	0.008	Yes
KCl vs. AITC	97.89	28.69	26.44 to 169.3	0.006	Yes
4-HNE vs. AITC	1.783	34.87	-85.07 to 88.63	0.9986	No

## Sheet: Figure 3F
Velocity (µm/s)
	KCl	4-HNE	AITC
Preparation 1	238.183	228.81	241.685
Preparation 2	180.854	143.433	148.412
Preparation 3	295.936	282.121	251.936
Preparation 4	209.334	182.591	192.737
Preparation 5	93.9484	115.539	193.058
Preparation 6	253.687	225.748	252.86
Mean	212	196.4	213.4
Median	223.8	204.2	217.4
Std. Deviation	69.83	61.31	42.21
Std. Error of Mean	28.51	25.03	17.23
Lower 95% CI	138.7	132	169.2
Upper 95% CI	285.3	260.7	257.7
One-way ANOVA and Tukey's multiple comparisons test
	Mean Diff.	SE of diff.	95.00% CI of diff.	Adjusted P Value	Significant?
KCl vs. 4-HNE	15.62	34.02	-72.75 to 104.0	0.8912	No
KCl vs. AITC	-1.458	34.02	-89.82 to 86.91	0.999	No
4-HNE vs. AITC	17.07	34.02	-71.29 to 105.4	0.8715	No
