# Supplementary material for: Brain endothelial cell TRPA1 channels initiate neurovascular coupling
Source: eLife journal article supplement (doi:10.7554/elife.63040), 2021-02-26
Supplement: supp [file elife-63040-supp-v1.zip › elife_poa_e63040_Figure_4_figure_supplement_1_source_data_1.xlsx]

## Sheet: Figure 4-figure supplement 1B
Vasodilation (%)
	KCl	ATP
Preparation 1	20.9495	20.8363
Preparation 2	26.9216	25.1871
Preparation 3	17.4492	18.9057
Preparation 4	13.8614	15.7556
Preparation 5	28.218	27.8084
Preparation 6	32.6138	32.0306
Mean	23.34	23.42
Median	23.94	23.01
Std. Deviation	7.112	6.039
Std. Error of Mean	2.903	2.465
Lower 95% CI	15.87	17.08
Upper 95% CI	30.8	29.76
Students paired t-test, two-tailed
Mean of differences (B - A)	0.085
SD of differences	1.356
SEM of differences	0.5536
95% confidence interval	-1.338 to 1.508
P value	0.884
Significantly different (P < 0.05)?	No
