# Supplementary material for: Brain endothelial cell TRPA1 channels initiate neurovascular coupling
Source: eLife journal article supplement (doi:10.7554/elife.63040), 2021-02-26
Supplement: supp [file elife-63040-supp-v1.zip › elife_poa_e63040_Figure_4_figure_supplement_2_source_data_1.xlsx]

## Sheet: Figure 4-figure supplement 2B
Endothelial Cell Length (μm)
	Length
Cell 1	39.501
Cell 2	22.774
Cell 3	32.77
Cell 4	30.379
Cell 5	33.181
Cell 6	39.979
Cell 7	32.628
Cell 8	17.145
Cell 9	33.011
Cell 10	27.902
Cell 11	24.81
Cell 12	18.781
Cell 13	24.902
Cell 14	27.973
Cell 15	33.907
Cell 16	36.245
Cell 17	26.481
Cell 18	23.07
Cell 19	18.228
Cell 20	25.553
Cell 21	40.94
Cell 22	39.588
Cell 23	15.322
Cell 24	33.51
Cell 25	19.212
Cell 26	30.904
Cell 27	38.237
Cell 28	19.903
Cell 29	25.345
Cell 30	18.577
Cell 31	18.896
Cell 32	27.926
Cell 33	27.017
Cell 34	31.398
Cell 35	30.923
Cell 36	40.163
Cell 37	29.466
Cell 38	22.574
Cell 39	28.301
Cell 40	30.867
Cell 41	26.992
Cell 42	22.612
Cell 43	38.452
Cell 44	27.081
Cell 45	25.355
Cell 46	36.779
Cell 47	23.544
Cell 48	26.016
Cell 49	31.571
Cell 50	16.889
Cell 51	18.946
Cell 52	22.349
Cell 53	24.436
Cell 54	48.26
Cell 55	37.226
Cell 56	15.299
Cell 57	30.278
Cell 58	29.934
Cell 59	29.082
Cell 60	19.228
Cell 61	27.512
Cell 62	25.607
Cell 63	34.036
Cell 64	32.602
Cell 65	41.561
Cell 66	26.306
Cell 67	24.63
Cell 68	21.077
Cell 69	20.819
Cell 70	39.871
Cell 71	20.384
Cell 72	36.168
Cell 73	26.637
Cell 74	34.988
Cell 75	35.365
Cell 76	24.279
Cell 77	44.289
Cell 78	47.584
Cell 79	36.936
Cell 80	23.372
Cell 81	24.491
Cell 82	27.073
Cell 83	21.099
Cell 84	39.109
Cell 85	38.95
Cell 86	16.992
Cell 87	24.486
Cell 88	32.404
Cell 89	34.963
Cell 90	29.252
Cell 91	23.16
Cell 92	16.83
Cell 93	33.857
Cell 94	35.252
Cell 95	17.943
Cell 96	29.146
Cell 97	31.499
Cell 98	18.888
Cell 99	26.675
Cell 100	37.162
Cell 101	21.804
Cell 102	29.871
Cell 103	18.922
Cell 104	23.685
Cell 105	21.573
Cell 106	38.567
Cell 107	34.412
Cell 108	14.471
Cell 109	21.986
Cell 110	33.185
Cell 111	32.614
Cell 112	19.761
Cell 113	45.606
Cell 114	32.765
Cell 115	21.315
Cell 116	28.6
Cell 117	20.621
Cell 118	20.827
Cell 119	26.455
Cell 120	19.396
Cell 121	26.654
Cell 122	43.506
Cell 123	33.499
Cell 124	28.481
Cell 125	23.197
Cell 126	28.464
Cell 127	32.2
Cell 128	25.354
Cell 129	23.577
Cell 130	21.018
Cell 131	28.22
Cell 132	42.039
Cell 133	32.844
Cell 134	14.865
Cell 135	22.287
Cell 136	27.345
Cell 137	27.535
Cell 138	26.87
Cell 139	35.478
Cell 140	28.647
Cell 141	29.658
Cell 142	20.292
Cell 143	26.344
Cell 144	39.358
Cell 145	20.22
Cell 146	41.036
Cell 147	30.025
Cell 148	34.595
Cell 149	28.069
Cell 150	45.874
Cell 151	20.921
Cell 152	23.312
Cell 153	27.722
Cell 154	28.65
Cell 155	27.127
Cell 156	25.97
Cell 157	29.636
Cell 158	38.13
Cell 159	45.34
Cell 160	31.673
Cell 161	48.759
Cell 162	34.234
Cell 163	28.114
Cell 164	26.375
Cell 165	25.338
Cell 166	28.645
Cell 167	28.073
Cell 168	23.402
Cell 169	41.353
Cell 170	18.729
Cell 171	27.501
Cell 172	26.198
Cell 173	29.08
Mean	28.73
Median	27.93
Std. Deviation	7.565
Std. Error of Mean	0.5751
Lower 95% CI	27.59
Upper 95% CI	29.86

## Sheet: Figure 4-figure supplement 2C
Capillary Length (μm)
	Length
Preparation 1	162.04
Preparation 2	133.725
Preparation 3	94.945
Preparation 4	126.778
Preparation 5	144.111
Preparation 6	105.301
Preparation 7	86.059
Preparation 8	148.153
Preparation 9	88.907
Mean	121.1
Median	126.8
Std. Deviation	28.12
Std. Error of Mean	9.374
Lower 95% CI	99.5
Upper 95% CI	142.7
