# Supplementary material for: Brain endothelial cell TRPA1 channels initiate neurovascular coupling
Source: eLife journal article supplement (doi:10.7554/elife.63040), 2021-02-26
Supplement: supp [file elife-63040-supp-v1.zip › elife_poa_e63040_Figure_4_source_data_1.xlsx]

## Sheet: Figure 4B
Vasodilation (%)
	VECad-Cre + Tamoxifen	Panx1-ecKO + Vehicle	Panx1-ecKO + Tamoxifen
Preparation 1	9.5783	15.1249	4.9864
Preparation 2	14.9354	10.1849	4.90357
Preparation 3	20.3334	19.6553	4.41321
Preparation 4	20.3859	19.2351	4.02119
Preparation 5	22.1323	12.2734	0.874408
Preparation 6	27.1336	17.317	3.634
Mean	19.08	15.63	3.805
Median	20.36	16.22	4.217
Std. Deviation	6.081	3.827	1.526
Std. Error of Mean	2.483	1.562	0.6228
Lower 95% CI	12.7	11.62	2.204
Upper 95% CI	25.47	19.65	5.406
One-way ANOVA and Tukey's multiple comparisons test
	Mean Diff.	SE of diff.	95.00% CI of diff.	Adjusted P Value	Significant?
VECad-Cre + Tamoxifen vs. Panx1-ecKO + Tamoxifen	15.28	2.448	8.918 to 21.64	<0.0001	Yes
Panx1-ecKO + Vehicle vs. Panx1-ecKO + Tamoxifen	11.83	2.448	5.467 to 18.19	0.0006	Yes

## Sheet: Figure 4C
Vasodilation (%)
	VECad-Cre + Tamoxifen	Panx1-ecKO + Vehicle	Panx1-ecKO + Tamoxifen
Preparation 1	8.76471	16.7748	3.3255
Preparation 2	19.1653	8.02698	0.642884
Preparation 3	21.5233	21.057	1.68495
Preparation 4	23.0703	21.5365	6.41636
Preparation 5	21.8382	14.3284	2.74814
Preparation 6	11.4035	20.338	1.2876
Mean	17.63	17.01	2.684
Median	20.34	18.56	2.217
Std. Deviation	6.036	5.213	2.072
Std. Error of Mean	2.464	2.128	0.8458
Lower 95% CI	11.29	11.54	0.5101
Upper 95% CI	23.96	22.48	4.858
One-way ANOVA and Tukey's multiple comparisons test
	Mean Diff.	SE of diff.	95.00% CI of diff.	Adjusted P Value	Significant?
VECad-Cre + Tamoxifen vs. Panx1-ecKO + Tamoxifen	14.94	2.747	7.809 to 22.08	0.0002	Yes
Panx1-ecKO + Vehicle vs. Panx1-ecKO + Tamoxifen	14.33	2.747	7.191 to 21.46	0.0003	Yes

## Sheet: Figure 4D
Vasodilation (%)
	VECad-Cre + Tamoxifen	Panx1-ecKO + Vehicle	Panx1-ecKO + Tamoxifen
Preparation 1	9.01105	15.201	10.925
Preparation 2	24.0984	8.17134	12.9795
Preparation 3	23.206	26.4459	16.2838
Preparation 4	20.5429	20.4473	24.2384
Preparation 5	21.0014	14.9973	41.0659
Preparation 6	18.9765	19.761	22.515
Mean	19.47	17.5	21.33
Median	20.77	17.48	19.4
Std. Deviation	5.45	6.203	10.98
Std. Error of Mean	2.225	2.532	4.483
Lower 95% CI	13.75	10.99	9.812
Upper 95% CI	25.19	24.01	32.86
One-way ANOVA and Tukey's multiple comparisons test
	Mean Diff.	SE of diff.	95.00% CI of diff.	Adjusted P Value	Significant?
VECad-Cre + Tamoxifen vs. Panx1-ecKO + Tamoxifen	-1.862	4.58	-13.76 to 10.03	0.9134	No
Panx1-ecKO + Vehicle vs. Panx1-ecKO + Tamoxifen	-3.831	4.58	-15.73 to 8.065	0.6869	No

## Sheet: Figure 4E
Vasodilation (%)
	AITC	AITC + Apyrase
Preparation 1	14.5478	2.58106
Preparation 2	14.4305	2.44484
Preparation 3	21.5345	7.89813
Preparation 4	10.4183	3.06084
Preparation 5	12.1148	1.22465
Preparation 6	20.9948	4.31202
Preparation 7	19.2795	4.98666
Preparation 8	14.7607	2.8724
Preparation 9	18.3621	4.54934
Mean	16.27	3.77
Median	14.76	3.061
Std. Deviation	3.931	1.949
Std. Error of Mean	1.31	0.6496
Lower 95% CI	13.25	2.272
Upper 95% CI	19.29	5.268
Students paired t-test, two-tailed
Mean of differences (B - A)	-12.5
SD of differences	2.591
SEM of differences	0.8635
95% confidence interval	-14.49 to -10.51
P value	<0.0001
Significantly different (P < 0.05)?	Yes

## Sheet: Figure 4F
Vasodilation (%)
	AITC	AITC + PPADS
Preparation 1	10.77	2.185
Preparation 2	17.39	1.21
Preparation 3	19.1862	5.46166
Preparation 4	22.488	10.5861
Preparation 5	19.6103	5.17407
Preparation 6	8.88924	-2.34468
Preparation 7	12.928	2.53319
Preparation 8	20.297	6.57659
Preparation 9	11.54	3.699
Mean	15.9	3.898
Median	17.39	3.699
Std. Deviation	4.91	3.657
Std. Error of Mean	1.637	1.219
Lower 95% CI	12.13	1.087
Upper 95% CI	19.67	6.709
Students paired t-test, two-tailed
Mean of differences (B - A)	-12
SD of differences	2.772
SEM of differences	0.924
95% confidence interval	-14.13 to -9.871
P value	<0.0001
Significantly different (P < 0.05)?	Yes

## Sheet: Figure 4G
Vasodilation (%)
	KCl	KCl + Apyrase
Preparation 1	16.0836	17.4915
Preparation 2	16.458	11.3298
Preparation 3	23.0819	18.2463
Preparation 4	12.5095	12.6996
Preparation 5	11.6408	4.13484
Preparation 6	23.7726	20.6718
Preparation 7	23.8159	28.986
Preparation 8	16.0629	9.07002
Preparation 9	18.6428	19.0853
Mean	18.01	15.75
Median	16.46	17.49
Std. Deviation	4.661	7.316
Std. Error of Mean	1.554	2.439
Lower 95% CI	14.43	10.12
Upper 95% CI	21.59	21.37
Students paired t-test, two-tailed
Mean of differences (B - A)	-2.261
SD of differences	4.293
SEM of differences	1.431
95% confidence interval	-5.561 to 1.039
P value	0.1527
Significantly different (P < 0.05)?	No

## Sheet: Figure 4H
Vasodilation (%)
	KCl	KCl + PPADS
Preparation 1	19.5	16.98
Preparation 2	10.23	11.17
Preparation 3	22.5665	18.6854
Preparation 4	23.9633	19.6571
Preparation 5	14.8195	14.9154
Preparation 6	16.614	19.5982
Preparation 7	8.28092	7.54717
Preparation 8	27.6174	21.0649
Preparation 9	19.48	20.79
Mean	18.12	16.71
Median	19.48	18.69
Std. Deviation	6.325	4.67
Std. Error of Mean	2.108	1.557
Lower 95% CI	13.26	13.12
Upper 95% CI	22.98	20.3
Students paired t-test, two-tailed
Mean of differences (B - A)	-1.407
SD of differences	3.105
SEM of differences	1.035
95% confidence interval	-3.794 to 0.9796
P value	0.2111
Significantly different (P < 0.05)?	No

## Sheet: Figure 4J
Vasodilation (%)
	ATP	ATP + PPADS
Preparation 1	25.5943	5.06052
Preparation 2	24.5878	5.0158
Preparation 3	17.2043	6.42745
Preparation 4	20.553	1.68334
Preparation 5	20.8582	5.04885
Preparation 6	16.8489	1.35555
Mean	20.94	4.099
Median	20.71	5.032
Std. Deviation	3.628	2.071
Std. Error of Mean	1.481	0.8456
Lower 95% CI	17.13	1.925
Upper 95% CI	24.75	6.272
Students paired t-test, two-tailed
Mean of differences (B - A)	-16.84
SD of differences	3.602
SEM of differences	1.47
95% confidence interval	-20.62 to -13.06
P value	<0.0001
Significantly different (P < 0.05)?	Yes

## Sheet: Figure 4K
Velocity (µm/s)
	KCl	ATP
Preparation 1	142.893	48.6413
Preparation 2	238.364	89.7968
Preparation 3	196.119	136.249
Preparation 4	189.49	103.258
Preparation 5	315.394	172.734
Preparation 6	307.988	136.949
Mean	231.7	114.6
Median	217.2	119.8
Std. Deviation	69	43.46
Std. Error of Mean	28.17	17.74
Lower 95% CI	159.3	69
Upper 95% CI	304.1	160.2
Students paired t-test, two-tailed
Mean of differences (B - A)	-117.1
SD of differences	43.13
SEM of differences	17.61
95% confidence interval	-162.4 to -71.84
P value	0.0012
Significantly different (P < 0.05)?	Yes

## Sheet: Figure 4L
Vasodilation (%)
	VECad-Cre + Tamoxifen	Panx1-ecKO + Vehicle	Panx1-ecKO + Tamoxifen
Preparation 1	19.0014	17.9473	8.61051
Preparation 2	25.3157	18.4177	-0.505124
Preparation 3	30.3277	32.8823	0.207813
Preparation 4	21.8432	20.8273	7.63435
Preparation 5	21.7438	17.0185	8.1528
Preparation 6	15.006	30.8581	4.60553
Mean	22.21	22.99	4.784
Median	21.79	19.62	6.12
Std. Deviation	5.255	7.02	4.076
Std. Error of Mean	2.145	2.866	1.664
Lower 95% CI	16.69	15.62	0.5069
Upper 95% CI	27.72	30.36	9.062
One-way ANOVA and Tukey's multiple comparisons test
	Mean Diff.	SE of diff.	95.00% CI of diff.	Adjusted P Value	Significant?
VECad-Cre + Tamoxifen vs. Panx1-ecKO + Tamoxifen	17.42	3.223	9.049 to 25.79	0.0002	Yes
Panx1-ecKO + Vehicle vs. Panx1-ecKO + Tamoxifen	18.21	3.223	9.835 to 26.58	0.0001	Yes
