# Supplementary material for: Brain endothelial cell TRPA1 channels initiate neurovascular coupling
Source: eLife journal article supplement (doi:10.7554/elife.63040), 2021-02-26
Supplement: supp [file elife-63040-supp-v1.zip › elife_poa_e63040_Figure_5_figure_supplement_1_source_data_1.xlsx]

## Sheet: Figure 5-figure supplement 1A
Duration (s)
	AITC	ATP
Preparation 1	15.83	19.21
Preparation 2	25.8967	39.07
Preparation 3	19.4625	23.81
Preparation 4	39.4667	35.08
Preparation 5	48.325	56.09
Preparation 6	22.9325	16.83
Preparation 7		22.265
Preparation 8		19.72
Preparation 9		36.94
Preparation 10		33.11
Preparation 11		21.3593
Preparation 12		33.0475
Preparation 13		28.9227
Mean	28.65	29.65
Median	24.41	28.92
Std. Deviation	12.59	10.89
Std. Error of Mean	5.142	3.021
Lower 95% CI	15.43	23.07
Upper 95% CI	41.87	36.23
Students unpaired t-test, two-tailed
Difference between means (B - A) ± SEM	0.9981 ± 5.636
95% confidence interval	-10.89 to 12.89
P value	0.8615
Significantly different (P < 0.05)?	No

## Sheet: Figure 5-figure supplement 1B
Rise Time (t1/2, s)
	AITC	ATP
Preparation 1	0.393333	0.32
Preparation 2	1.62833	0.41
Preparation 3	0.37875	0.83
Preparation 4	0.773333	0.18
Preparation 5	0.625	2.56
Preparation 6	0.895	1.98
Preparation 7		1.48071
Preparation 8		0.46
Preparation 9		0.801667
Preparation 10		0.355556
Preparation 11		0.627333
Preparation 12		0.525
Preparation 13		1.57
Mean	0.7823	0.9308
Median	0.6992	0.6273
Std. Deviation	0.462	0.7366
Std. Error of Mean	0.1886	0.2043
Lower 95% CI	0.2974	0.4857
Upper 95% CI	1.267	1.376
Students unpaired t-test, two-tailed
Difference between means (B - A) ± SEM	0.1485 ± 0.3295
95% confidence interval	-0.5467 to 0.8437
P value	0.6579
Significantly different (P < 0.05)?	No

## Sheet: Figure 5-figure supplement 1C
Decay Time (t1/2, s)
	AITC	ATP
Preparation 1	7.09833	5.56
Preparation 2	8.18667	16.42
Preparation 3	8.74	8.19
Preparation 4	15.6983	15.64
Preparation 5	14.785	23.56
Preparation 6	5.19	3.56
Preparation 7		5.64179
Preparation 8		7.64
Preparation 9		12.4033
Preparation 10		6.70333
Preparation 11		6.27867
Preparation 12		12.255
Preparation 13		5.76546
Mean	9.95	9.971
Median	8.463	7.64
Std. Deviation	4.284	5.769
Std. Error of Mean	1.749	1.6
Lower 95% CI	5.453	6.484
Upper 95% CI	14.45	13.46
Students unpaired t-test, two-tailed
Difference between means (B - A) ± SEM	0.02086 ± 2.653
95% confidence interval	-5.576 to 5.618
P value	0.9938
Significantly different (P < 0.05)?	No
