# Supplementary material for: Brain endothelial cell TRPA1 channels initiate neurovascular coupling
Source: eLife journal article supplement (doi:10.7554/elife.63040), 2021-02-26
Supplement: supp [file elife-63040-supp-v1.zip › elife_poa_e63040_Figure_5_source_data_1.xlsx]

## Sheet: Figure 5C
Change in [Ca2+] (Δ F/F0)
	AITC	AITC + HC-030031
Preparation 1	3.06833	0.235
Preparation 2	2.615	0.113333
Preparation 3	3.61625	0.1475
Preparation 4	3.345	0.1
Preparation 5	4.23333	0.214444
Preparation 6	3.5075	0.243333
Mean	3.398	0.1756
Median	3.426	0.181
Std. Deviation	0.5444	0.06326
Std. Error of Mean	0.2223	0.02582
Lower 95% CI	2.826	0.1092
Upper 95% CI	3.969	0.242
Students paired t-test, two-tailed
Mean of differences (B - A)	-3.222
SD of differences	0.5231
SEM of differences	0.2136
95% confidence interval	-3.771 to -2.673
P value	<0.0001
Significantly different (P < 0.05)?	Yes

## Sheet: Figure 5D
Velocity (µm/s)
	AITC
Preparation 1	29.4772
Preparation 2	30.3584
Preparation 3	33.4385
Preparation 4	36.3821
Preparation 5	37.4594
Preparation 6	41.2398
Mean	34.73
Median	34.91
Std. Deviation	4.493
Std. Error of Mean	1.834
Lower 95% CI	30.01
Upper 95% CI	39.44

## Sheet: Figure 5G
Change in [Ca2+] (Δ F/F0)
	ATP	ATP + PPADS
Preparation 1	2.4075	0.17
Preparation 2	4.115	0.36
Preparation 3	3.09429	0.26
Preparation 4	1.94	0.23
Preparation 5	3.18667	0.19
Preparation 6	1.04	0.16
Preparation 7	2.91143	0.28
Mean	2.671	0.2357
Median	2.911	0.23
Std. Deviation	0.9876	0.07091
Std. Error of Mean	0.3733	0.0268
Lower 95% CI	1.757	0.1701
Upper 95% CI	3.584	0.3013
Students paired t-test, two-tailed
Mean of differences (B - A)	-2.435
SD of differences	0.9344
SEM of differences	0.3532
95% confidence interval	-3.299 to -1.571
P value	0.0005
Significantly different (P < 0.05)?	Yes

## Sheet: Figure 5H
Velocity (µm/s)
	ATP
Preparation 1	42.9461
Preparation 2	30.0765
Preparation 3	51.3456
Preparation 4	28.5316
Preparation 5	25.9739
Preparation 6	28.96
Preparation 7	30.3477
Preparation 8	61.1939
Preparation 9	39.3083
Preparation 10	34.5286
Preparation 11	36.8597
Preparation 12	53.9246
Preparation 13	29.3051
Mean	37.95
Median	34.53
Std. Deviation	11.26
Std. Error of Mean	3.124
Lower 95% CI	31.14
Upper 95% CI	44.75

## Sheet: Figure 5J
Change in [Ca2+] (Δ F/F0)
	ATP	ATP + 0 Ca2+	ATP + Ca2+ reintroduced
Preparation 1	3.27	0.28	1.11
Preparation 2	1.99	0.16	2.16
Preparation 3	3.16	0.32	2.00167
Preparation 4	1.84	0.15	1.26133
Preparation 5	2.21	0.218333	1.075
Preparation 6	2.9	0.165455	2.42182
Mean	2.562	0.2156	1.672
Median	2.555	0.1919	1.632
Std. Deviation	0.6238	0.07066	0.5916
Std. Error of Mean	0.2547	0.02885	0.2415
Lower 95% CI	1.907	0.1415	1.051
Upper 95% CI	3.216	0.2898	2.292
One-way ANOVA and Tukey's multiple comparisons test
	Mean Diff.	SE of diff.	95.00% CI of diff.	Adjusted P Value	Significant?
ATP vs. ATP + 0 Ca2+	2.346	0.2332	1.587 to 3.105	0.0004	Yes
ATP vs. ATP + Ca2+ reintroduced	0.89	0.3233	-0.1619 to 1.942	0.0868	No
ATP + 0 Ca2+ vs. ATP + Ca2+ reintroduced	-1.456	0.2488	-2.266 to -0.6464	0.0048	Yes
