# Supplementary material for: Brain endothelial cell TRPA1 channels initiate neurovascular coupling
Source: eLife journal article supplement (doi:10.7554/elife.63040), 2021-02-26
Supplement: supp [file elife-63040-supp-v1.zip › elife_poa_e63040_Figure_6_figure_supplement_1_source_data_1.xlsx]

## Sheet: Figure 6-figure supplement 1B
Vasodilation (%)
	KCl	AITC	ATP
Preparation 1	23.1886	22.6533	-3.64169
Preparation 2	22.2251	25.4972	-8.25972
Preparation 3	22.3128	25.9365	5.76096
Preparation 4	26.9091	31.9772	3.39835
Preparation 5	29.346	29.782	2.70495
Preparation 6	18.4758	16.6207	8.08656
Mean	23.74	25.41	1.342
Median	22.75	25.72	3.052
Std. Deviation	3.842	5.429	6.134
Std. Error of Mean	1.569	2.216	2.504
Lower 95% CI	19.71	19.71	-5.096
Upper 95% CI	27.78	31.11	7.779
One-way ANOVA and Tukey's multiple comparisons test
	Mean Diff.	SE of diff.	95.00% CI of diff.	Adjusted P Value	Significant?
KCl vs. AITC	-1.668	3.016	-9.502 to 6.166	0.8465	No
KCl vs. ATP	22.4	3.016	14.57 to 30.24	<0.0001	Yes
AITC vs. ATP	24.07	3.016	16.24 to 31.90	<0.0001	Yes
