# Supplementary material for: Brain endothelial cell TRPA1 channels initiate neurovascular coupling
Source: eLife journal article supplement (doi:10.7554/elife.63040), 2021-02-26
Supplement: supp [file elife-63040-supp-v1.zip › elife_poa_e63040_Figure_6_figure_supplement_2_source_data_1.xlsx]

## Sheet: Figure 6-figure supplement 2B
Vasodilation (%)
	Capillary	Arteriole
Preparation 1	1.50438	16.2664
Preparation 2	0.560201	20.1839
Preparation 3	1.23451	37.356
Preparation 4	-4.86201	15.6136
Preparation 5	1.07415	11.8828
Preparation 6	-1.54876	12.9316
Mean	-0.3396	19.04
Median	0.8172	15.94
Std. Deviation	2.474	9.431
Std. Error of Mean	1.01	3.85
Lower 95% CI	-2.936	9.141
Upper 95% CI	2.257	28.94
Students paired t-test, two-tailed
Mean of differences (B - A)	19.38
SD of differences	8.948
SEM of differences	3.653
95% confidence interval	9.988 to 28.77
P value	0.0032
Significantly different (P < 0.05)?	Yes
