# Supplementary material for: Brain endothelial cell TRPA1 channels initiate neurovascular coupling
Source: eLife journal article supplement (doi:10.7554/elife.63040), 2021-02-26
Supplement: supp [file elife-63040-supp-v1.zip › elife_poa_e63040_Figure_6_source_data_1.xlsx]

## Sheet: Figure 6C
Vasodilation (%)
	KCl	4-HNE	AITC
Preparation 1	25.3847	10.2716	28.4649
Preparation 2	24.1888	11.7694	22.2542
Preparation 3	15.6186	17.0168	11.6158
Preparation 4	5.93835	31.5004	4.96684
Preparation 5	19.2525	16.4659	17.4845
Preparation 6	40.9031	29.9598	36.2662
Preparation 7	13.7308		12.9158
Preparation 8	35.3504		30.8424
Mean	22.55	19.5	20.6
Median	21.72	16.74	19.87
Std. Deviation	11.49	9.096	10.75
Std. Error of Mean	4.062	3.714	3.8
Lower 95% CI	12.94	9.951	11.61
Upper 95% CI	32.15	29.04	29.59
One-way ANOVA and Tukey's multiple comparisons test
	Mean Diff.	SE of diff.	95.00% CI of diff.	Adjusted P Value	Significant?
KCl vs. 4-HNE	3.049	5.74	-11.53 to 17.63	0.8571	No
KCl vs. AITC	1.945	5.315	-11.56 to 15.45	0.9291	No

## Sheet: Figure 6D
Velocity (µm/s)
	KCl	4-HNE	AITC
Preparation 1	197.038	107.757	205.461
Preparation 2	283.26	262.782	165.654
Preparation 3	262.507	236.233	115.574
Preparation 4	205.963	324.171	234.027
Preparation 5	289.815	203.466	211.325
Preparation 6	313.005	198.865	266.166
Preparation 7	204.919		280.716
Preparation 8	162.788		241.051
Mean	239.9	222.2	215
Median	53.97	72.44	53.99
Std. Deviation	19.08	29.57	19.09
Std. Error of Mean	234.2	219.8	222.7
Lower 95% CI	194.8	146.2	169.9
Upper 95% CI	285	298.2	260.1
One-way ANOVA and Tukey's multiple comparisons test
	Mean Diff.	SE of diff.	95.00% CI of diff.	Adjusted P Value	Significant?
KCl vs. 4-HNE	17.7	29.88	-64.73 to 100.1	0.9334	No
KCl vs. AITC	24.92	27.67	-51.40 to 101.2	0.8046	No

## Sheet: Figure 6E
Vasodilation (%)
	KCl	KCl + BaCl2
Preparation 1	18.7657	-0.453078
Preparation 2	21.8559	5.1861
Preparation 3	31.0553	-1.61381
Preparation 4	24.1996	5.29263
Preparation 5	21.2366	1.64827
Preparation 6	21.9324	-2.69095
Mean	23.17	1.228
Median	21.89	0.5976
Std. Deviation	4.234	3.424
Std. Error of Mean	1.729	1.398
Lower 95% CI	18.73	-2.365
Upper 95% CI	27.62	4.822
Students paired t-test, two-tailed
Mean of differences (B - A)	-21.95
SD of differences	5.869
SEM of differences	2.396
95% confidence interval	-28.11 to -15.79
P value	0.0003
Significantly different (P < 0.05)?	Yes

## Sheet: Figure 6F
Vasodilation (%)
	AITC	AITC + BaCl2
Preparation 1	16.6129	5.90482
Preparation 2	22.2307	1.55615
Preparation 3	26.0116	4.90731
Preparation 4	24.684	2.09106
Preparation 5	12.1647	1.82883
Preparation 6	14.6503	-3.56795
Mean	19.39	2.12
Median	19.42	1.96
Std. Deviation	5.698	3.312
Std. Error of Mean	2.326	1.352
Lower 95% CI	13.41	-1.356
Upper 95% CI	25.37	5.596
Students paired t-test, two-tailed
Mean of differences (B - A)	-17.27
SD of differences	5.416
SEM of differences	2.211
95% confidence interval	-22.96 to -11.59
P value	0.0006
Significantly different (P < 0.05)?	Yes

## Sheet: Figure 6G
Vasodilation (%)
	AITC	AITC + BaCl2
Preparation 1	19.5205	5.64716
Preparation 2	15.6683	4.62645
Preparation 3	29.5903	2.6153
Preparation 4	20.591	-0.40038
Preparation 5	18.6561	3.48767
Preparation 6	27.4913	5.44402
Mean	21.92	3.57
Median	20.06	4.057
Std. Deviation	5.425	2.264
Std. Error of Mean	2.215	0.9242
Lower 95% CI	16.23	1.194
Upper 95% CI	27.61	5.946
Students paired t-test, two-tailed
Mean of differences (B - A)	-18.35
SD of differences	5.977
SEM of differences	2.44
95% confidence interval	-24.62 to -12.08
P value	0.0007
Significantly different (P < 0.05)?	Yes

## Sheet: Figure 6H
Vasodilation (%)
	AITC	AITC + L-NAME + Indomethacin
Preparation 1	18.4554	10.7139
Preparation 2	13.3581	29.1155
Preparation 3	28.4914	16.4271
Preparation 4	19.7844	12.6699
Preparation 5	10.6647	16.7071
Preparation 6	16.0693	7.84982
Preparation 7	13.9456	7.84982
Mean	17.25	14.48
Median	16.07	12.67
Std. Deviation	5.846	7.397
Std. Error of Mean	2.21	2.796
Lower 95% CI	11.85	7.635
Upper 95% CI	22.66	21.32
Students paired t-test, two-tailed
Mean of differences (B - A)	-2.777
SD of differences	9.93
SEM of differences	3.753
95% confidence interval	-11.96 to 6.407
P value	0.4874
Significantly different (P < 0.05)?	No

## Sheet: Figure 6I
Vasodilation (%)
	AITC	AITC + TRAM-34 + Apamin
Preparation 1	17.2659	-2.15301
Preparation 2	12.0835	-0.17088
Preparation 3	10.3557	5.33473
Preparation 4	24.3541	-6.78429
Preparation 5	10.2094	3.99095
Preparation 6	35.5385	1.65107
Preparation 7	24.3348	3.79658
Mean	19.16	0.8093
Median	17.27	1.651
Std. Deviation	9.428	4.235
Std. Error of Mean	3.563	1.601
Lower 95% CI	10.44	-3.108
Upper 95% CI	27.88	4.726
Students paired t-test, two-tailed
Mean of differences (B - A)	-18.35
SD of differences	11.35
SEM of differences	4.29
95% confidence interval	-28.85 to -7.857
P value	0.0052
Significantly different (P < 0.05)?	Yes

## Sheet: Figure 6K
Vasodilation (%)
	NS309	NS309 + BaCl2
Preparation 1	28.7014	7.61467
Preparation 2	22.1633	0.990712
Preparation 3	25.5688	10.9742
Preparation 4	11.7988	4.75789
Preparation 5	22.9903	-0.25305
Preparation 6	33.9703	-0.0266866
Mean	24.2	4.01
Median	24.28	2.874
Std. Deviation	7.443	4.596
Std. Error of Mean	3.039	1.876
Lower 95% CI	16.39	-0.8141
Upper 95% CI	32.01	8.833
Students paired t-test, two-tailed
Mean of differences (B - A)	-20.19
SD of differences	9.01
SEM of differences	3.678
95% confidence interval	-29.64 to -10.73
P value	0.0027
Significantly different (P < 0.05)?	Yes

## Sheet: Figure 6L
Velocity (µm/s)
	NS309
Preparation 1	220.074
Preparation 2	164.299
Preparation 3	170.079
Preparation 4	221.292
Preparation 5	247.219
Preparation 6	165.047
Mean	198
Median	195.1
Std. Deviation	35.93
Std. Error of Mean	14.67
Lower 95% CI	160.3
Upper 95% CI	235.7
