# Supplementary material for: Brain endothelial cell TRPA1 channels initiate neurovascular coupling
Source: eLife journal article supplement (doi:10.7554/elife.63040), 2021-02-26
Supplement: supp [file elife-63040-supp-v1.zip › elife_poa_e63040_Figure_7_figure_supplement_1_source_data_1.xlsx]

## Sheet: Figure 7-figure supplement 1A
Flux Rate (RBC/s)
	AITC
Animal 1	2.25
Animal 2	5.66667
Animal 3	6
Animal 4	18
Animal 5	5.5
Animal 6	14.5
Animal 7	9
Animal 8	15
Animal 9	26
Animal 10	6
Animal 11	20
Mean	11.63
Median	9
Std. Deviation	7.538
Std. Error of Mean	2.273
Lower 95% CI	6.565
Upper 95% CI	16.69

## Sheet: Figure 7-figure supplement 1B
Latency (s)
	AITC
Animal 1	13
Animal 2	14
Animal 3	7
Animal 4	12
Animal 5	6
Animal 6	2
Animal 7	7
Animal 8	5
Animal 9	2
Animal 10	6
Animal 11	9
Mean	7.545
Median	7
Std. Deviation	4.083
Std. Error of Mean	1.231
Lower 95% CI	4.802
Upper 95% CI	10.29
