# Supplementary material for: Brain endothelial cell TRPA1 channels initiate neurovascular coupling
Source: eLife journal article supplement (doi:10.7554/elife.63040), 2021-02-26
Supplement: supp [file elife-63040-supp-v1.zip › elife_poa_e63040_Figure_7_source_data_1.xlsx]

## Sheet: Figure 7C
Flux (cells/s)
	Baseline	AITC
Animal 1	8.5	16.2
Animal 2	25	29.6667
Animal 3	22.6667	39.05
Animal 4	22	29.8261
Animal 5	35	61.9
Animal 6	28.1667	39.4762
Animal 7	34	44.4545
Animal 8	22	32
Animal 9	33.1667	54.25
Animal 10	19	39.25
Animal 11	18	35.9167
Mean	24.32	38.36
Median	22.67	39.05
Std. Deviation	7.958	12.38
Std. Error of Mean	2.399	3.732
Lower 95% CI	18.97	30.05
Upper 95% CI	29.66	46.68
Students paired t-test, two-tailed
Mean of differences (B - A)	14.04
SD of differences	6.909
SEM of differences	2.083
95% confidence interval	9.403 to 18.69
P value	<0.0001
Significantly different (P < 0.05)?	Yes

## Sheet: Figure 7E
Flux (cells/s)
	Baseline	AITC
Animal 1	8.5	8.52381
Animal 2	33.3333	31.1905
Animal 3	15.6667	26.7619
Animal 4	13.3333	8
Animal 5	51	51.0952
Animal 6	15.3333	11.4211
Animal 7	74.8333	77.2381
Mean	30.29	30.6
Median	15.67	26.76
Std. Deviation	24.57	25.74
Std. Error of Mean	9.287	9.73
Lower 95% CI	7.562	6.796
Upper 95% CI	53.01	54.41
Students paired t-test, two-tailed
Mean of differences (B - A)	0.3187
SD of differences	5.424
SEM of differences	2.05
95% confidence interval	-4.698 to 5.335
P value	0.8816
Significantly different (P < 0.05)?	No

## Sheet: Figure 7F
Δ Flux (cells/s)
	Trpa1fl/fl	Trpa1-ecKO
Animal 1	7.7	0.0238095
Animal 2	4.66667	-2.14286
Animal 3	16.3833	11.0952
Animal 4	7.82609	-5.33333
Animal 5	26.9	0.0952381
Animal 6	11.3095	-3.91228
Animal 7	10.4545	2.40476
Animal 8	10
Animal 9	21.0833
Animal 10	20.25
Animal 11	17.9167
Mean	14.04	0.3187
Median	11.31	0.02381
Std. Deviation	6.909	5.424
Std. Error of Mean	2.083	2.05
Lower 95% CI	9.403	-4.698
Upper 95% CI	18.69	5.335
Students unpaired t-test, two-tailed
Difference between means (B - A) ± SEM	-13.73 ± 3.091
95% confidence interval	-20.28 to -7.173
P value	0.0004
Significantly different (P < 0.05)?	Yes

## Sheet: Figure 7G
Area (μm2)
	Baseline	AITC
Animal 1	72.647	125.916
Animal 2	184.109	327.161
Animal 3	41.659	73.103
Animal 4	51.88	82.006
Animal 5	145.629	183.409
Animal 6	253.716	371.201
Animal 7	203.481	286.461
Animal 8	96.35	148.473
Animal 9	134.492	213.409
Animal 10	100.416	183.063
Animal 11	83.97	168.324
Mean	124.4	196.6
Median	100.4	183.1
Std. Deviation	66.99	96.3
Std. Error of Mean	20.2	29.04
Lower 95% CI	79.39	131.9
Upper 95% CI	169.4	261.3
Students paired t-test, two-tailed
Mean of differences (B - A)	72.2
SD of differences	35.87
SEM of differences	10.82
95% confidence interval	48.10 to 96.30
P value	<0.0001
Significantly different (P < 0.05)?	Yes

## Sheet: Figure 7H
Area (μm2)
	Baseline	AITC
Animal 1	59.839	65.215
Animal 2	145.981	157.682
Animal 3	224.058	251.192
Animal 4	88.276	96.519
Animal 5	132.601	126.342
Animal 6	53.772	55.335
Animal 7	78.934	88.938
Mean	111.9	120.2
Median	88.28	96.52
Std. Deviation	60.42	67.54
Std. Error of Mean	22.84	25.53
Lower 95% CI	56.04	57.71
Upper 95% CI	167.8	182.6
Students paired t-test, two-tailed
Mean of differences (B - A)	8.252
SD of differences	10.29
SEM of differences	3.889
95% confidence interval	-1.263 to 17.77
P value	0.0781
Significantly different (P < 0.05)?	No

## Sheet: Figure 7I
Area (μm2)
	Trpa1fl/fl	Trpa1-ecKO
Animal 1	53.269	5.376
Animal 2	143.052	11.701
Animal 3	31.444	27.134
Animal 4	30.126	8.243
Animal 5	37.78	-6.259
Animal 6	117.485	1.563
Animal 7	82.98	10.004
Animal 8	52.123
Animal 9	78.917
Animal 10	82.647
Animal 11	84.354
Mean	72.2	8.252
Median	78.92	8.243
Std. Deviation	35.87	10.29
Std. Error of Mean	10.82	3.889
Lower 95% CI	48.1	-1.263
Upper 95% CI	96.3	17.77
Students unpaired t-test, two-tailed
Difference between means (B - A) ± SEM	-63.95 ± 14.04
95% confidence interval	-93.72 to -34.17
P value	0.0003
Significantly different (P < 0.05)?	Yes
