# Supplementary material for: Brain endothelial cell TRPA1 channels initiate neurovascular coupling
Source: eLife journal article supplement (doi:10.7554/elife.63040), 2021-02-26
Supplement: supp [file elife-63040-supp-v1.zip › elife_poa_e63040_Figure_8_figure_supplement_2_source_data_1.xlsx]

## Sheet: Figure 8-figure supplement 2A
Δ Blood Flow (%)
	Control	HC-030031
Animal 1	1.88214	-0.42065
Animal 2	-2.49703	2.72316
Animal 3	-0.390039	0.325632
Animal 4	0.494327	-0.923271
Animal 5	1.0162	0.0558971
Animal 6	0.823836	0.19851
Mean	0.2216	0.3265
Median	0.6591	0.1272
Std. Deviation	1.523	1.261
Std. Error of Mean	0.6216	0.5149
Lower 95% CI	-1.376	-0.9971
Upper 95% CI	1.819	1.65
Students paired t-test, two-tailed
Mean of differences (B - A)	0.105
SD of differences	2.695
SEM of differences	1.1
95% confidence interval	-2.724 to 2.933
P value	0.9277
Significantly different (P < 0.05)?	No

## Sheet: Figure 8-figure supplement 2B
Δ Blood Flow (%)
	Trpa1fl/fl	Trpa1-ecKO
Animal 1	1.60605	3.43614
Animal 2	2.79596	0.609972
Animal 3	0.069735	-1.68865
Animal 4	0.122438	-0.50486
Animal 5	-0.199255	-0.110764
Animal 6	-0.101363	0.192025
Mean	0.7156	0.3223
Median	0.09609	0.04063
Std. Deviation	1.216	1.715
Std. Error of Mean	0.4965	0.7003
Lower 95% CI	-0.5606	-1.478
Upper 95% CI	1.992	2.122
Students unpaired t-test, two-tailed
Difference between means (B - A) ± SEM	-0.3933 ± 0.8584
95% confidence interval	-2.306 to 1.519
P value	0.6566
Significantly different (P < 0.05)?	No

## Sheet: Figure 8-figure supplement 2C
Δ Blood Flow (%)
	Control	HC-030031
Animal 1	-0.29717	6.38547
Animal 2	-0.18022	1.44172
Animal 3	-0.644468	-0.0385208
Animal 4	0.067843	0.402714
Animal 5	-0.16676	-0.5118
Animal 6	-0.1356	0.512656
Mean	-0.2261	1.365
Median	-0.1735	0.4577
Std. Deviation	0.2368	2.544
Std. Error of Mean	0.09666	1.039
Lower 95% CI	-0.4745	-1.304
Upper 95% CI	0.02241	4.035
Students paired t-test, two-tailed
Mean of differences (B - A)	1.591
SD of differences	2.573
SEM of differences	1.051
95% confidence interval	-1.109 to 4.292
P value	0.1902
Significantly different (P < 0.05)?	No

## Sheet: Figure 8-figure supplement 2D
Δ Blood Flow (%)
	Trpa1fl/fl	Trpa1-ecKO
Animal 1	1.68971	-1.98616
Animal 2	-0.22721	0.673435
Animal 3	-0.0572036	0.0448129
Animal 4	0.116716	-0.0871113
Animal 5	-0.312321	0.324267
Animal 6	0.239449	0.105224
Mean	0.2415	-0.1543
Median	0.02976	0.07502
Std. Deviation	0.7387	0.9361
Std. Error of Mean	0.3016	0.3822
Lower 95% CI	-0.5337	-1.137
Upper 95% CI	1.017	0.8281
Students unpaired t-test, two-tailed
Difference between means (B - A) ± SEM	-0.3958 ± 0.4868
95% confidence interval	-1.480 to 0.6889
P value	0.4352
Significantly different (P < 0.05)?	No

## Sheet: Figure 8-figure supplement 2E
Δ Blood Flow (%)
	Control	HC-030031
Animal 1	0.0425261	0.921409
Animal 2	-0.70851	-0.37854
Animal 3	0.841458	1.72824
Animal 4	-1.19782	1.07511
Animal 5	0.709484	0.687173
Animal 6	-0.05596	0.171593
Mean	-0.06147	0.7008
Median	-0.006717	0.8043
Std. Deviation	0.7913	0.7334
Std. Error of Mean	0.323	0.2994
Lower 95% CI	-0.8918	-0.06886
Upper 95% CI	0.7689	1.471
Students paired t-test, two-tailed
Mean of differences (B - A)	0.7623
SD of differences	0.8246
SEM of differences	0.3366
95% confidence interval	-0.1030 to 1.628
P value	0.0729
Significantly different (P < 0.05)?	No

## Sheet: Figure 8-figure supplement 2F
Δ Blood Flow (%)
	Trpa1fl/fl	Trpa1-ecKO
Animal 1	-0.0843565	0.116584
Animal 2	0.43711	0.785855
Animal 3	-0.249461	0.660494
Animal 4	0.0768836	-0.0580094
Animal 5	-0.449787	-0.18315
Animal 6	0.0538264	0.179145
Mean	-0.03596	0.2502
Median	-0.01527	0.1479
Std. Deviation	0.3046	0.3901
Std. Error of Mean	0.1243	0.1593
Lower 95% CI	-0.3556	-0.1592
Upper 95% CI	0.2836	0.6596
Students unpaired t-test, two-tailed
Difference between means (B - A) ± SEM	0.2861 ± 0.2020
95% confidence interval	-0.1641 to 0.7363
P value	0.1871
Significantly different (P < 0.05)?	No
