# Supplementary material for: Brain endothelial cell TRPA1 channels initiate neurovascular coupling
Source: eLife journal article supplement (doi:10.7554/elife.63040), 2021-02-26
Supplement: supp [file elife-63040-supp-v1.zip › elife_poa_e63040_Figure_8_figure_supplement_3_source_data_1.xlsx]

## Sheet: Figure 8-figure supplement 3B
Δ Blood Flow (%)
	Control	HC-030031
Animal 1	18.8557	22.9111
Animal 2	22.0503	23.6598
Animal 3	24.4172	24.8927
Animal 4	18.4909	23.7893
Animal 5	26.0061	18.7014
Animal 6	20.6752	20.6688
Mean	21.75	22.44
Median	21.36	23.29
Std. Deviation	3.016	2.309
Std. Error of Mean	1.231	0.9427
Lower 95% CI	18.58	20.01
Upper 95% CI	24.91	24.86
Students paired t-test, two-tailed
Mean of differences (B - A)	0.688
SD of differences	4.424
SEM of differences	1.806
95% confidence interval	-3.955 to 5.331
P value	0.7189
Significantly different (P < 0.05)?	No

## Sheet: Figure 8-figure supplement 3C
Duration (s)
	Control	HC-030031
Animal 1	7.86333	7.25
Animal 2	5.49667	7.42333
Animal 3	6.80667	5.97333
Animal 4	5.42333	7.25
Animal 5	6.67333	7.89333
Animal 6	7.08667	6.32
Mean	6.558	7.018
Median	6.74	7.25
Std. Deviation	0.9458	0.7234
Std. Error of Mean	0.3861	0.2953
Lower 95% CI	5.566	6.259
Upper 95% CI	7.551	7.778
Students paired t-test, two-tailed
Mean of differences (B - A)	0.46
SD of differences	1.336
SEM of differences	0.5455
95% confidence interval	-0.9422 to 1.862
P value	0.4375
Significantly different (P < 0.05)?	No

## Sheet: Figure 8-figure supplement 3D
Decay Rate (% blood flow/s)
	Control	HC-030031
Animal 1	6.92515	7.36077
Animal 2	9.15204	8.97867
Animal 3	8.7088	8.77899
Animal 4	6.29626	6.48787
Animal 5	8.8631	7.92954
Animal 6	8.92806	9.32764
Mean	8.146	8.144
Median	8.786	8.354
Std. Deviation	1.214	1.087
Std. Error of Mean	0.4955	0.4436
Lower 95% CI	6.872	7.004
Upper 95% CI	9.419	9.284
Students paired t-test, two-tailed
Mean of differences (B - A)	-0.001655
SD of differences	0.5085
SEM of differences	0.2076
95% confidence interval	-0.5353 to 0.5319
P value	0.9939
Significantly different (P < 0.05)?	No

## Sheet: Figure 8-figure supplement 3E
Rise Rate (% blood flow/s)
	Control	HC-030031
Animal 1	15.887	16.4611
Animal 2	17.1443	14.6081
Animal 3	17.1706	17.6506
Animal 4	15.8741	16.6956
Animal 5	22.8706	18.4364
Animal 6	19.0918	18.8382
Mean	18.01	17.11
Median	17.16	17.17
Std. Deviation	2.658	1.542
Std. Error of Mean	1.085	0.6296
Lower 95% CI	15.22	15.5
Upper 95% CI	20.8	18.73
Students paired t-test, two-tailed
Mean of differences (B - A)	-0.8914
SD of differences	2.127
SEM of differences	0.8684
95% confidence interval	-3.124 to 1.341
P value	0.3517
Significantly different (P < 0.05)?	No

## Sheet: Figure 8-figure supplement 3F
Latency (s)
	Control	HC-030031
Animal 1	2.72	2.59333
Animal 2	2.35667	2.52
Animal 3	2.57	2.38333
Animal 4	2.93667	2.95667
Animal 5	3.29	2.22
Animal 6	1.97667	2.05667
Mean	2.642	2.455
Median	2.645	2.452
Std. Deviation	0.4565	0.3143
Std. Error of Mean	0.1864	0.1283
Lower 95% CI	2.163	2.125
Upper 95% CI	3.121	2.785
Students paired t-test, two-tailed
Mean of differences (B - A)	-0.1867
SD of differences	0.4517
SEM of differences	0.1844
95% confidence interval	-0.6607 to 0.2874
P value	0.3579
Significantly different (P < 0.05)?	No

## Sheet: Figure 8-figure supplement 3H
Δ Blood Flow (%)
	Trpa1fl/fl	Trpa1-ecKO
Animal 1	21.3796	17.6162
Animal 2	16.0676	22.786
Animal 3	23.0449	29.3101
Animal 4	21.469	24.341
Animal 5	20.5534	16.969
Animal 6	17.8445	22.6276
Mean	20.06	22.27
Median	20.97	22.71
Std. Deviation	2.597	4.561
Std. Error of Mean	1.06	1.862
Lower 95% CI	17.33	17.49
Upper 95% CI	22.79	27.06
Students unpaired t-test, two-tailed
Difference between means (B - A) ± SEM	2.215 ± 2.143
95% confidence interval	-2.559 to 6.989
P value	0.3256
Significantly different (P < 0.05)?	No

## Sheet: Figure 8-figure supplement 3I
Duration (s)
	Trpa1fl/fl	Trpa1-ecKO
Animal 1	5.46667	6.23
Animal 2	6.31333	7.02
Animal 3	5.87	5.9
Animal 4	6.14	6.32333
Animal 5	6.33	6.36333
Animal 6	5.70667	7.24333
Mean	5.971	6.513
Median	6.005	6.343
Std. Deviation	0.349	0.5108
Std. Error of Mean	0.1425	0.2085
Lower 95% CI	5.605	5.977
Upper 95% CI	6.337	7.049
Students unpaired t-test, two-tailed
Difference between means (B - A) ± SEM	0.5422 ± 0.2526
95% confidence interval	-0.02054 to 1.105
P value	0.0574
Significantly different (P < 0.05)?	No

## Sheet: Figure 8-figure supplement 3J
Decay Rate (% blood flow/s)
	Trpa1fl/fl	Trpa1-ecKO
Animal 1	5.54138	7.55448
Animal 2	6.50636	9.22988
Animal 3	6.39419	5.99237
Animal 4	7.64787	9.25667
Animal 5	7.99437	11.8181
Animal 6	9.88998	7.73565
Mean	7.329	8.598
Median	7.077	8.483
Std. Deviation	1.539	1.991
Std. Error of Mean	0.6285	0.8129
Lower 95% CI	5.713	6.508
Upper 95% CI	8.945	10.69
Students unpaired t-test, two-tailed
Difference between means (B - A) ± SEM	1.269 ± 1.028
95% confidence interval	-1.021 to 3.558
P value	0.2451
Significantly different (P < 0.05)?	No

## Sheet: Figure 8-figure supplement 3K
Rise Rate (% blood flow/s)
	Trpa1fl/fl	Trpa1-ecKO
Animal 1	17.4936	16.7626
Animal 2	18.3291	18.3587
Animal 3	23.253	21.3989
Animal 4	15.2508	15.935
Animal 5	17.801	19.9375
Animal 6	17.3815	15.1288
Mean	18.25	17.92
Median	17.65	17.56
Std. Deviation	2.667	2.426
Std. Error of Mean	1.089	0.9906
Lower 95% CI	15.45	15.37
Upper 95% CI	21.05	20.47
Students unpaired t-test, two-tailed
Difference between means (B - A) ± SEM	-0.3312 ± 1.472
95% confidence interval	-3.611 to 2.948
P value	0.8265
Significantly different (P < 0.05)?	No

## Sheet: Figure 8-figure supplement 3L
Latency (s)
	Trpa1fl/fl	Trpa1-ecKO
Animal 1	2.68333	2.29333
Animal 2	2.43333	2.24
Animal 3	2.73	2.69
Animal 4	2.29333	2.36667
Animal 5	2.61333	2.20333
Animal 6	2.77333	2.67333
Mean	2.588	2.411
Median	2.648	2.33
Std. Deviation	0.1871	0.2167
Std. Error of Mean	0.07637	0.08848
Lower 95% CI	2.391	2.184
Upper 95% CI	2.784	2.639
Students unpaired t-test, two-tailed
Difference between means (B - A) ± SEM	-0.1767 ± 0.1169
95% confidence interval	-0.4371 to 0.08376
P value	0.1616
Significantly different (P < 0.05)?	No
