# Supplementary material for: Brain endothelial cell TRPA1 channels initiate neurovascular coupling
Source: eLife journal article supplement (doi:10.7554/elife.63040), 2021-02-26
Supplement: supp [file elife-63040-supp-v1.zip › elife_poa_e63040_Figure_8_source_data_1.xlsx]

## Sheet: Figure 8B
Δ Blood Flow (%)
	Control	HC-030031
Animal 1	42.217	27.2728
Animal 2	42.9563	23.7408
Animal 3	53.5759	28.847
Animal 4	31.6644	14.7488
Animal 5	38.1223	17.7985
Animal 6	46.9155	21.0977
Mean	42.58	22.25
Median	42.59	22.42
Std. Deviation	7.47	5.448
Std. Error of Mean	3.05	2.224
Lower 95% CI	34.74	16.53
Upper 95% CI	50.41	27.97
Students paired t-test, two-tailed
Mean of differences (B - A)	-20.32
SD of differences	4.275
SEM of differences	1.745
95% confidence interval	-24.81 to -15.84
P value	<0.0001
Significantly different (P < 0.05)?	Yes

## Sheet: Figure 8C
Duration (s)
	Control	HC-030031
Animal 1	14.9533	11.7
Animal 2	14.98	10.4067
Animal 3	15.9233	11.9467
Animal 4	15.6	11.15
Animal 5	16.8667	11.4067
Animal 6	16.51	11.2267
Mean	15.81	11.31
Median	15.76	11.32
Std. Deviation	0.7856	0.532
Std. Error of Mean	0.3207	0.2172
Lower 95% CI	14.98	10.75
Upper 95% CI	16.63	11.86
Students paired t-test, two-tailed
Mean of differences (B - A)	-4.499
SD of differences	0.8211
SEM of differences	0.3352
95% confidence interval	-5.361 to -3.638
P value	<0.0001
Significantly different (P < 0.05)?	Yes

## Sheet: Figure 8D
Decay Rate (% blood flow/s)
	Control	HC-030031
Animal 1	6.39409	8.09555
Animal 2	5.22898	10.4759
Animal 3	5.74824	8.87856
Animal 4	4.72694	8.98892
Animal 5	4.18032	10.2621
Animal 6	4.60152	6.42665
Mean	5.147	8.855
Median	4.978	8.934
Std. Deviation	0.8163	1.49
Std. Error of Mean	0.3333	0.6083
Lower 95% CI	4.29	7.291
Upper 95% CI	6.003	10.42
Students paired t-test, two-tailed
Mean of differences (B - A)	3.708
SD of differences	1.801
SEM of differences	0.7352
95% confidence interval	1.818 to 5.598
P value	0.004
Significantly different (P < 0.05)?	Yes

## Sheet: Figure 8E
Rise Rate (% blood flow/s)
	Control	HC-030031
Animal 1	16.3746	18.3089
Animal 2	15.1485	20.377
Animal 3	18.8647	18.5313
Animal 4	17.4973	20.3269
Animal 5	19.6885	12.4035
Animal 6	15.9443	14.9191
Mean	17.25	17.48
Median	16.94	18.42
Std. Deviation	1.761	3.182
Std. Error of Mean	0.7188	1.299
Lower 95% CI	15.41	14.14
Upper 95% CI	19.1	20.82
Students paired t-test, two-tailed
Mean of differences (B - A)	0.2248
SD of differences	4.313
SEM of differences	1.761
95% confidence interval	-4.302 to 4.751
P value	0.9034
Significantly different (P < 0.05)?	No

## Sheet: Figure 8F
Latency (s)
	Control	HC-030031
Animal 1	2.29333	2.08667
Animal 2	2.68667	2.56333
Animal 3	2.67	3.38333
Animal 4	2.14667	2.22
Animal 5	2.86333	2.22
Animal 6	3.28667	2.96
Mean	2.658	2.572
Median	2.678	2.392
Std. Deviation	0.4081	0.5084
Std. Error of Mean	0.1666	0.2075
Lower 95% CI	2.229	2.039
Upper 95% CI	3.086	3.106
Students paired t-test, two-tailed
Mean of differences (B - A)	-0.08556
SD of differences	0.458
SEM of differences	0.187
95% confidence interval	-0.5662 to 0.3951
P value	0.6665
Significantly different (P < 0.05)?	No

## Sheet: Figure 8H
Δ Blood Flow (%)
	Trpa1fl/fl	Trpa1-ecKO
Animal 1	45.7184	28.4754
Animal 2	46.6594	22.4135
Animal 3	41.4598	32.585
Animal 4	54.6215	20.5573
Animal 5	46.6364	20.3494
Animal 6	39.3581	31.4358
Mean	45.74	25.97
Median	46.18	25.44
Std. Deviation	5.284	5.54
Std. Error of Mean	2.157	2.262
Lower 95% CI	40.2	20.16
Upper 95% CI	51.29	31.78
Students unpaired t-test, two-tailed
Difference between means (B - A) ± SEM	-19.77 ± 3.125
95% confidence interval	-26.74 to -12.81
P value	<0.0001
Significantly different (P < 0.05)?	Yes

## Sheet: Figure 8I
Duration (s)
	Trpa1fl/fl	Trpa1-ecKO
Animal 1	17.2067	10.88
Animal 2	16.9067	11.3267
Animal 3	14.08	11.94
Animal 4	15.8733	9.96667
Animal 5	16.42	11.09
Animal 6	17.5167	11.0867
Mean	16.33	11.05
Median	16.66	11.09
Std. Deviation	1.248	0.6441
Std. Error of Mean	0.5095	0.2629
Lower 95% CI	15.02	10.37
Upper 95% CI	17.64	11.72
Students unpaired t-test, two-tailed
Difference between means (B - A) ± SEM	-5.286 ± 0.5734
95% confidence interval	-6.563 to -4.008
P value	<0.0001
Significantly different (P < 0.05)?	Yes

## Sheet: Figure 8J
Decay Rate (% blood flow/s)
	Trpa1fl/fl	Trpa1-ecKO
Animal 1	4.31504	8.0309
Animal 2	6.6196	11.9268
Animal 3	5.82362	6.29895
Animal 4	7.42361	9.5381
Animal 5	4.85356	10.1068
Animal 6	4.78427	8.83023
Mean	5.637	9.122
Median	5.339	9.184
Std. Deviation	1.207	1.911
Std. Error of Mean	0.4926	0.7801
Lower 95% CI	4.37	7.117
Upper 95% CI	6.903	11.13
Students unpaired t-test, two-tailed
Difference between means (B - A) ± SEM	3.485 ± 0.9226
95% confidence interval	1.430 to 5.541
P value	0.0036
Significantly different (P < 0.05)?	Yes

## Sheet: Figure 8K
Rise Rate (% blood flow/s)
	Trpa1fl/fl	Trpa1-ecKO
Animal 1	18.5589	21.0721
Animal 2	18.1564	18.1247
Animal 3	17.9465	23.1632
Animal 4	20.2816	16.4995
Animal 5	19.6085	16.6099
Animal 6	24.1401	22.3074
Mean	19.78	19.63
Median	19.08	19.6
Std. Deviation	2.314	2.93
Std. Error of Mean	0.9448	1.196
Lower 95% CI	17.35	16.55
Upper 95% CI	22.21	22.7
Students unpaired t-test, two-tailed
Difference between means (B - A) ± SEM	-0.1525 ± 1.524
95% confidence interval	-3.549 to 3.244
P value	0.9223
Significantly different (P < 0.05)?	No

## Sheet: Figure 8L
Latency (s)
	Trpa1fl/fl	Trpa1-ecKO
Animal 1	3.49333	2.46333
Animal 2	2.88	2.16
Animal 3	2.45	2.55
Animal 4	2.33667	2.94
Animal 5	2.43667	2.23333
Animal 6	2.11333	2.71
Mean	2.618	2.509
Median	2.443	2.507
Std. Deviation	0.4959	0.2925
Std. Error of Mean	0.2025	0.1194
Lower 95% CI	2.098	2.203
Upper 95% CI	3.139	2.816
Students unpaired t-test, two-tailed
Difference between means (B - A) ± SEM	-0.1089 ± 0.2351
95% confidence interval	-0.6326 to 0.4148
P value	0.6531
Significantly different (P < 0.05)?	No

[truncated: 10 more sheets: Figure 8N, Figure 8O, Figure 8P, Figure 8Q, Figure 8R, Figure 8T, Figure 8U, Figure 8V, Figure 8W, Figure 8X]
