# Supplementary figures and images for: Brain endothelial cell TRPA1 channels initiate neurovascular coupling
Source: eLife journal article supplement (doi:10.7554/elife.63040), 2021-02-26

**A****Zone 1**

KCl (10 mM)

ATP (10  $\mu$ M)28  $\mu$ m**Zone 2**24  $\mu$ m10  $\mu$ m  
60 s**B**KCl  
ATP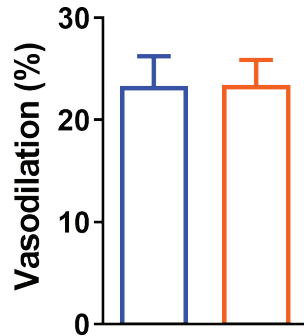

Supplement: supp [file elife-63040-supp-v1.zip]

**A**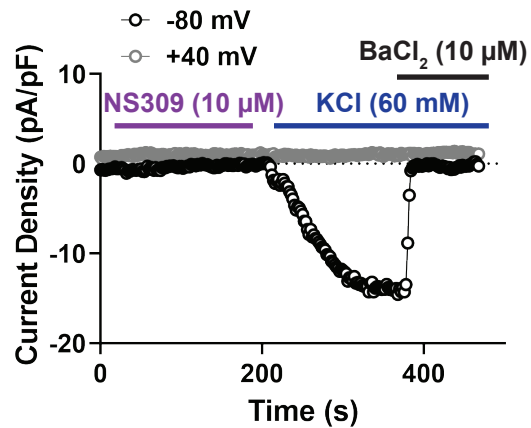**B**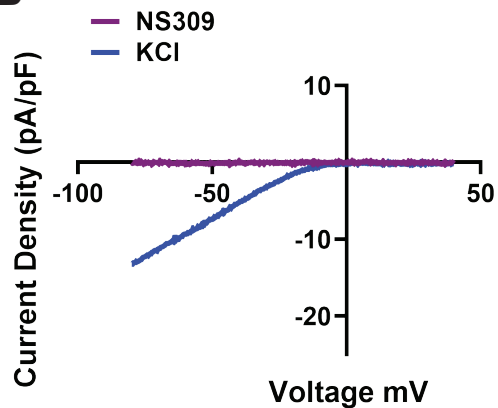**C**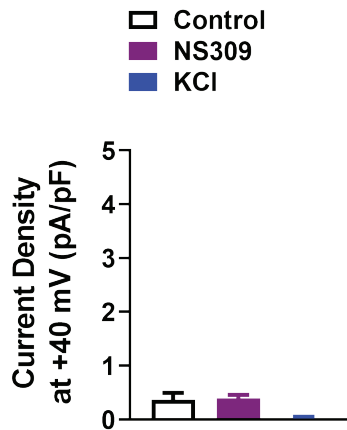**D**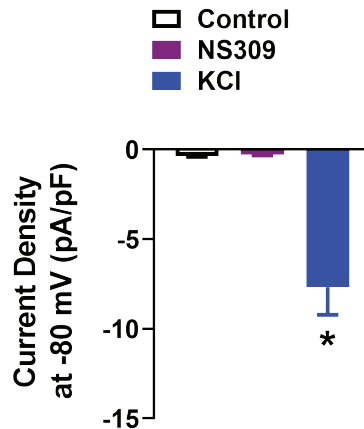

Supplement: supp [file elife-63040-supp-v1.zip › elife_poa_e63040_Figure_1_figure_supplement_1.pdf]

**A**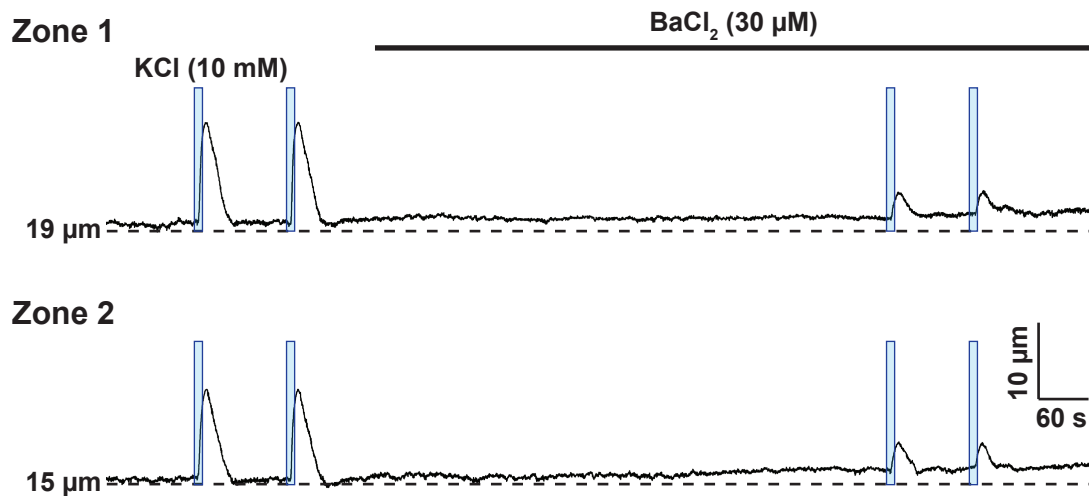**B**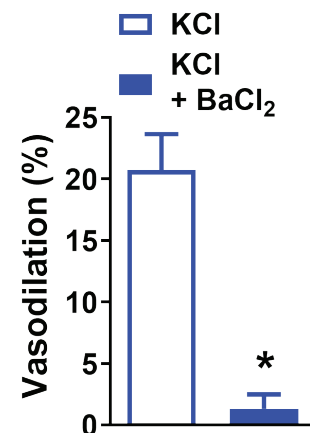**C**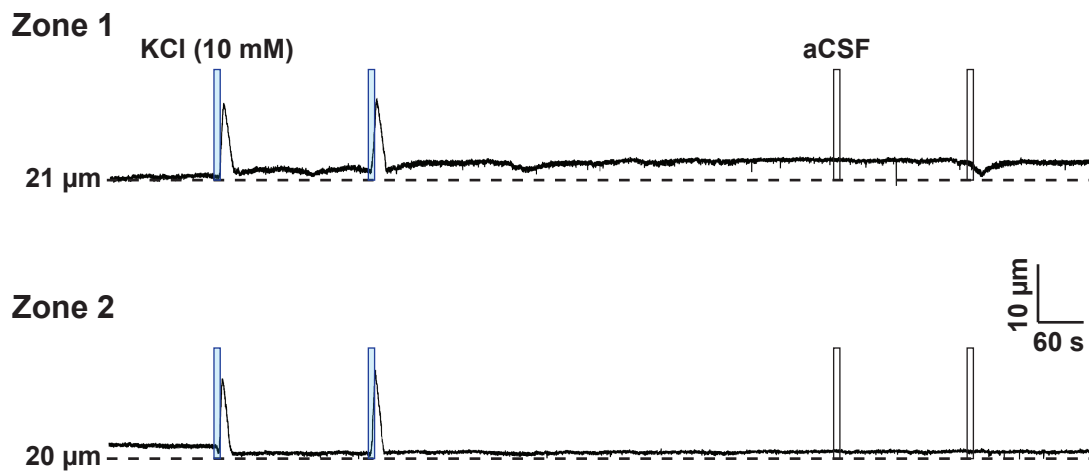**D**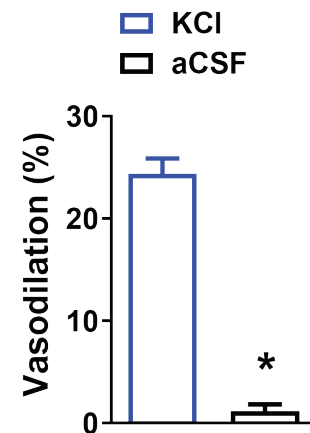

Supplement: supp [file elife-63040-supp-v1.zip › elife_poa_e63040_Figure_2_figure_supplement_1.pdf]

**A****Intact**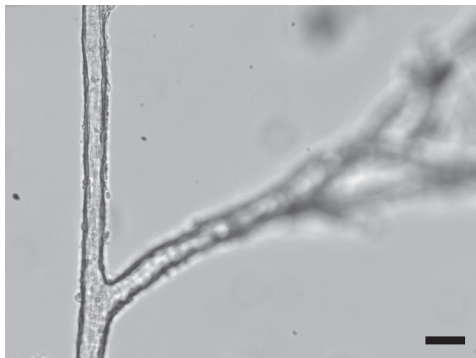**Detached**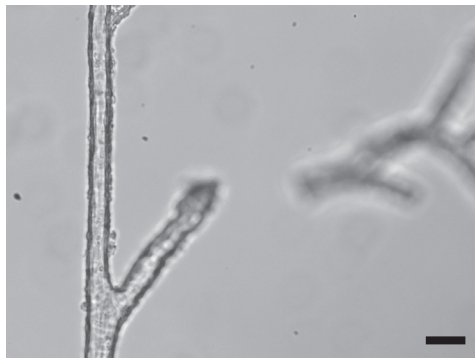**B**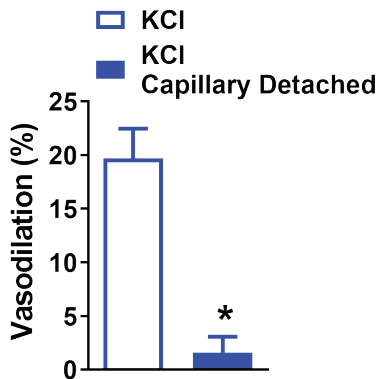**C**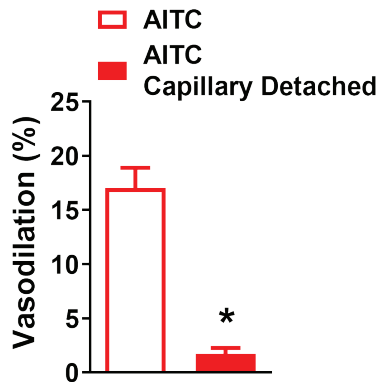

Supplement: supp [file elife-63040-supp-v1.zip › elife_poa_e63040_Figure_2_figure_supplement_2.pdf]

**A**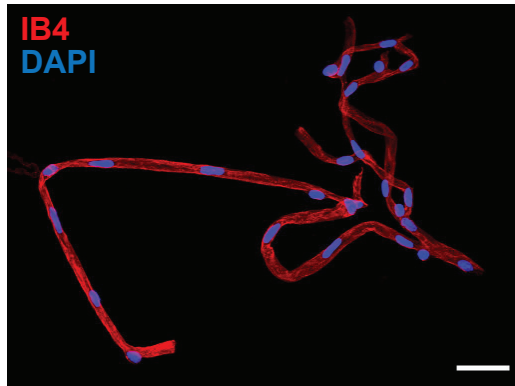**B**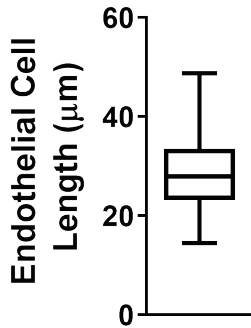**C**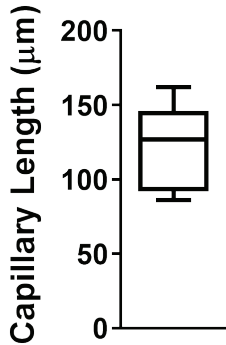

Supplement: supp [file elife-63040-supp-v1.zip › elife_poa_e63040_Figure_4_figure_supplement_2.pdf]

**A**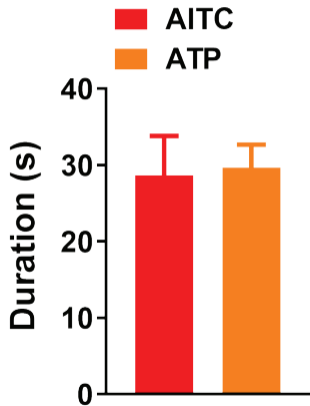**B**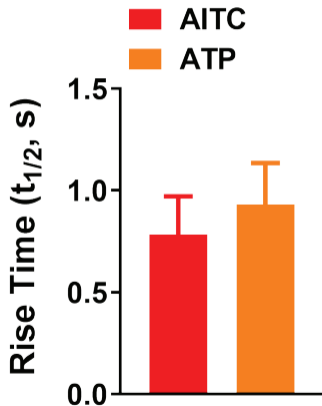**C**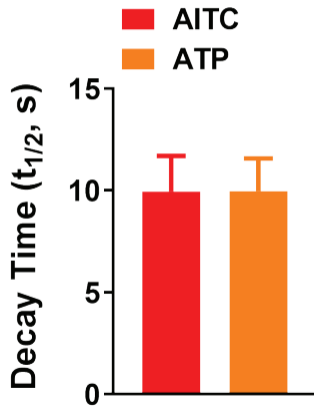

Supplement: supp [file elife-63040-supp-v1.zip › elife_poa_e63040_Figure_5_figure_supplement_1.pdf]

**A**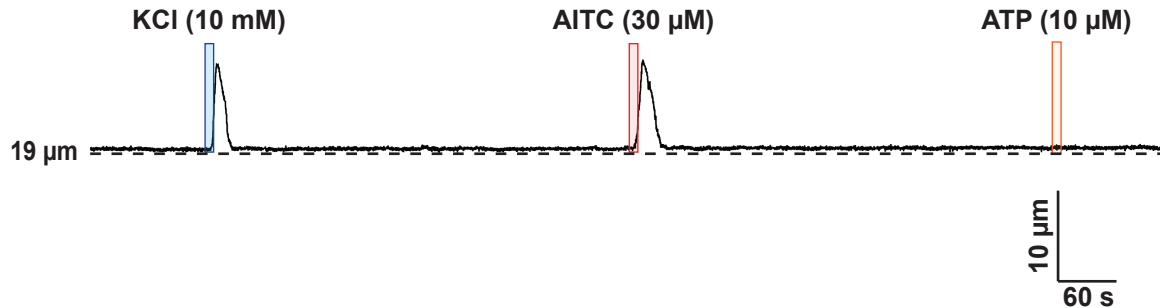**B**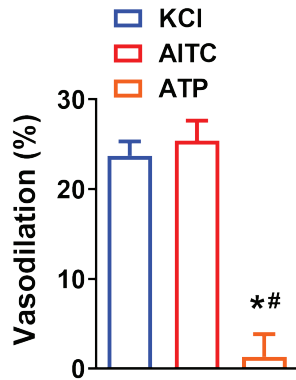

Supplement: supp [file elife-63040-supp-v1.zip › elife_poa_e63040_Figure_6_figure_supplement_1.pdf]

**A****Capillary**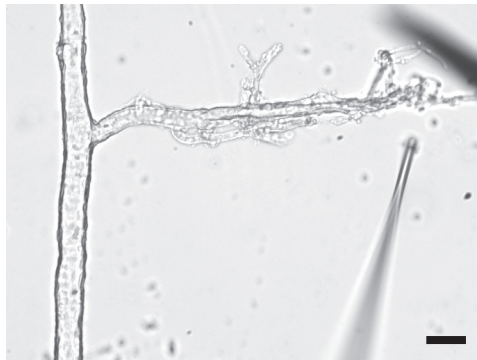**Arteriole**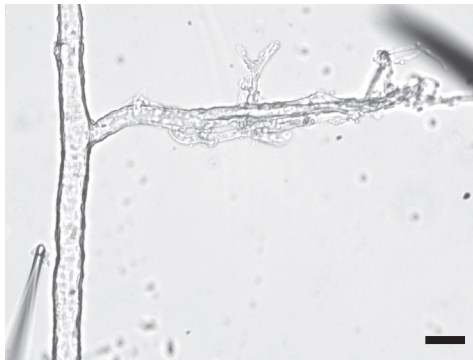**B**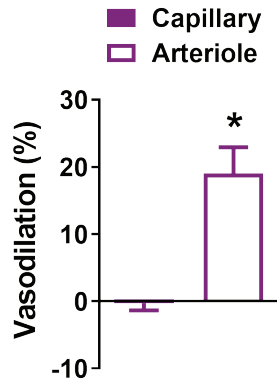

Supplement: supp [file elife-63040-supp-v1.zip › elife_poa_e63040_Figure_6_figure_supplement_2.pdf]

**A**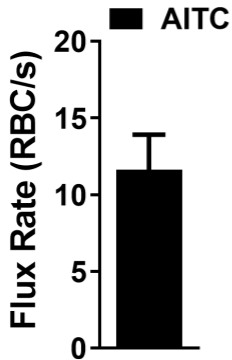**B**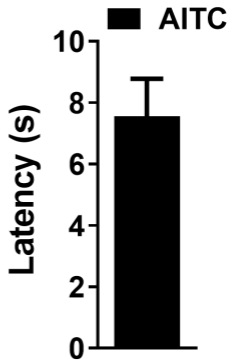

Supplement: supp [file elife-63040-supp-v1.zip › elife_poa_e63040_Figure_7_figure_supplement_1.pdf]

**A**

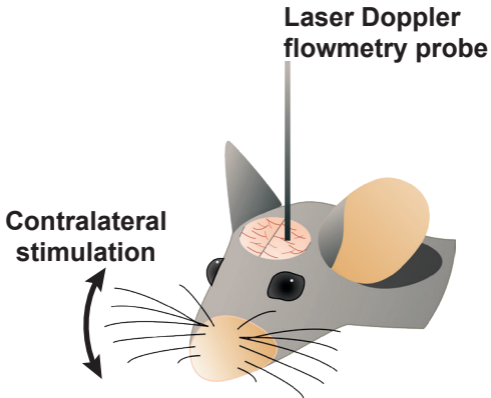

Supplement: supp [file elife-63040-supp-v1.zip › elife_poa_e63040_Figure_8_figure_supplement_1.pdf]

A

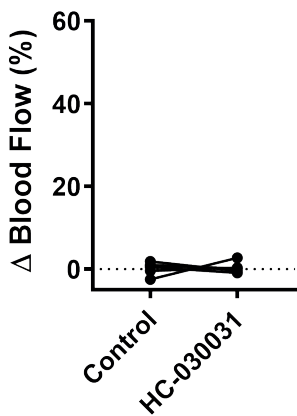

# B

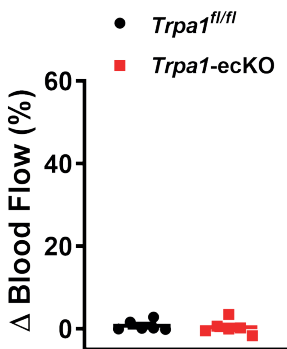

C

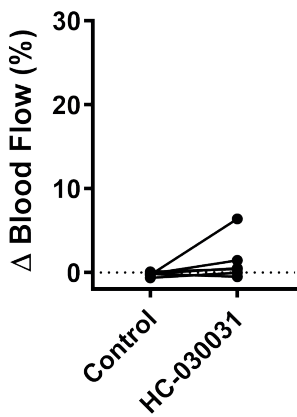

D

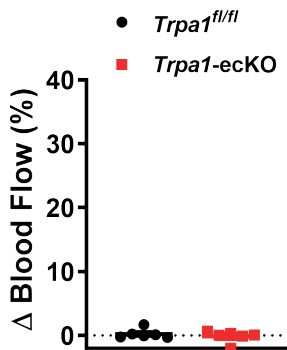

# E

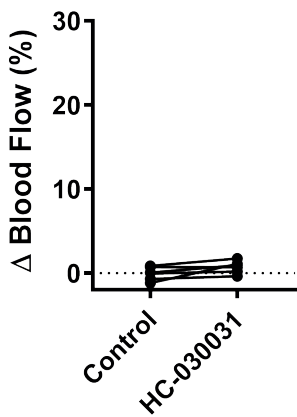

## F

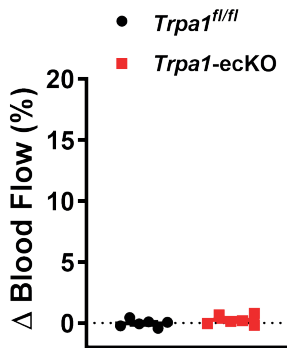

Supplement: supp [file elife-63040-supp-v1.zip › elife_poa_e63040_Figure_8_figure_supplement_2.pdf]

**A**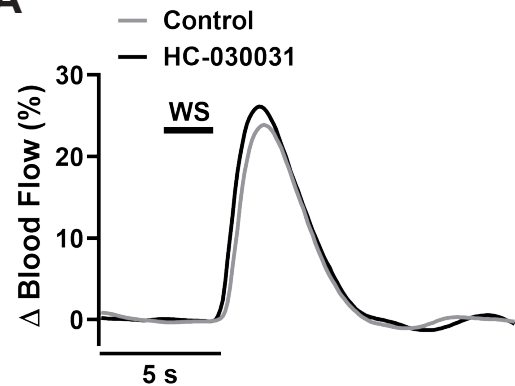**B**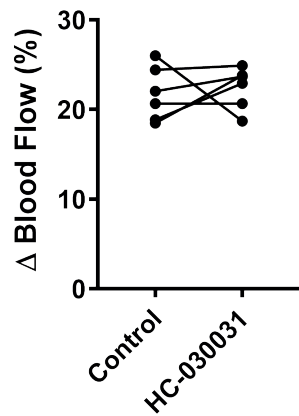**C**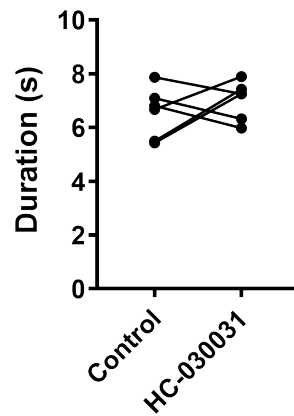**D**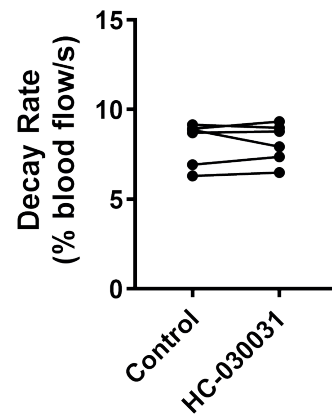**E**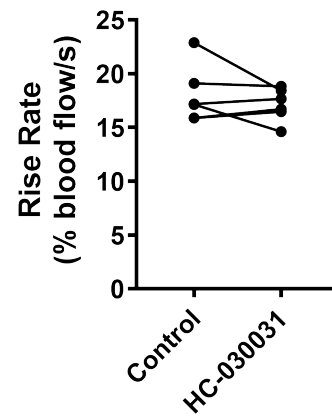**F**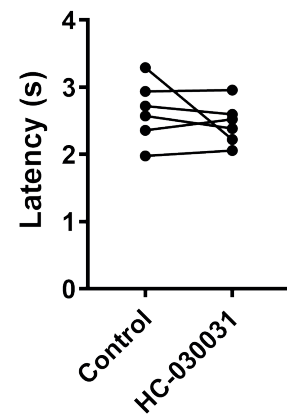**G**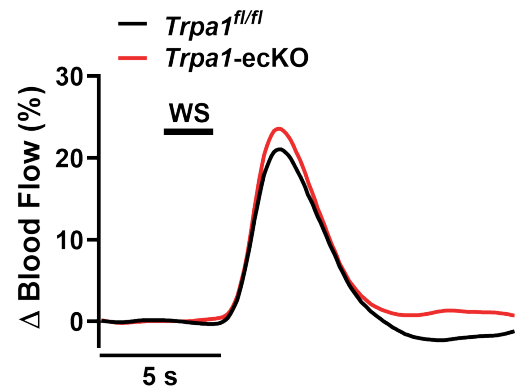**H**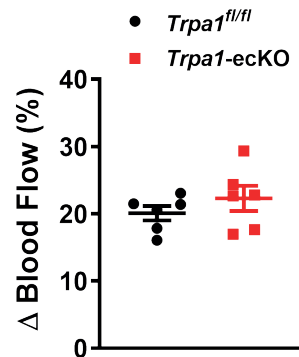**I**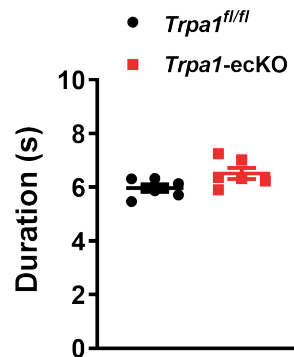**J**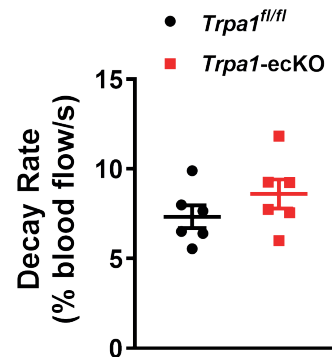**K**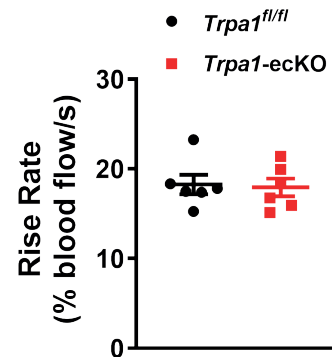**L**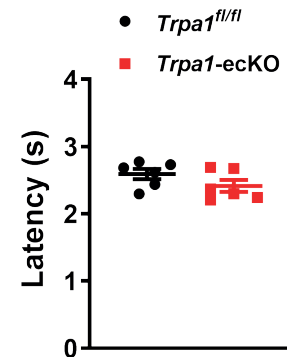

Supplement: supp [file elife-63040-supp-v1.zip › elife_poa_e63040_Figure_8_figure_supplement_3.pdf]
